# Supplementary material for: Identification of Abietane-Type Diterpenoids and Phenolic Acids Biosynthesis Genes in Salvia apiana Jepson Through Full-Length Transcriptomic and Metabolomic Profiling
Source: Frontiers journal article supplement (doi:10.3389/fpls.2022.919025), 2022-06-08
Supplement: Data_Sheet_1.pdf [file Data_Sheet_1.pdf]

## Supplementary Figures

### Supplementary Figures

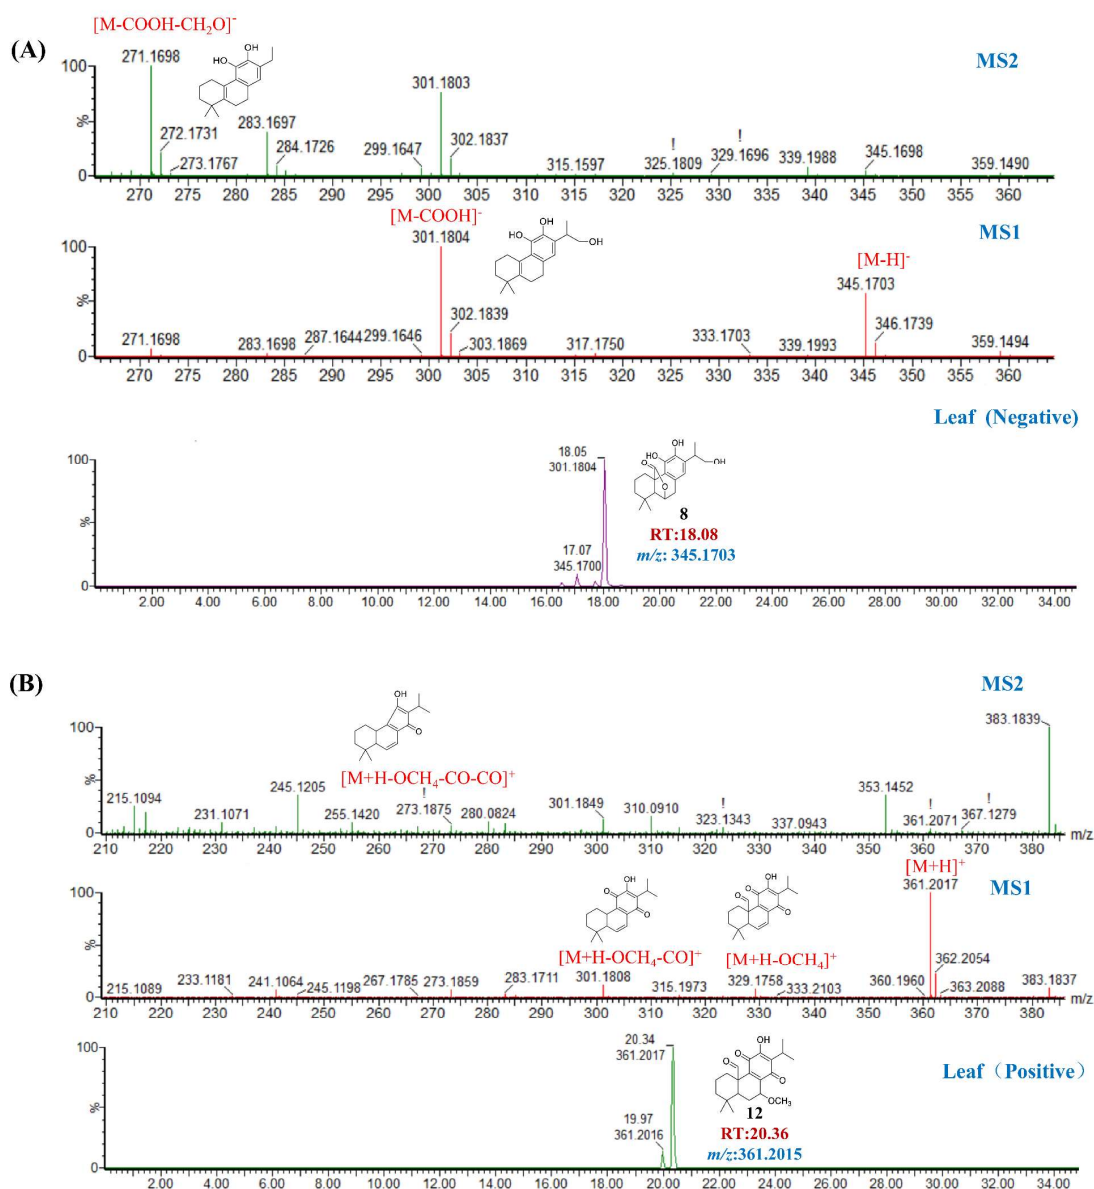

**Supplementary Figure 1.** The MS/MS fragment patterns of compound 9 and 12. (A) MS/MS fragment patterns of compound 9 in both negative-mode. (B) MS/MS fragment patterns of compound 12 in positive-ion mode. Compounds 9 and 12 are examples of all compounds.
