# Supplementary material for: Identification of Abietane-Type Diterpenoids and Phenolic Acids Biosynthesis Genes in Salvia apiana Jepson Through Full-Length Transcriptomic and Metabolomic Profiling
Source: Front Plant Sci. 2022 Jun 8;13:919025. doi: 10.3389/fpls.2022.919025 (PMC9213684; doi:10.3389/fpls.2022.919025)
Supplement: Supplementary file 2 [file Data_Sheet_2.xlsx]

## Sheet: Supplementary Table 1
Supplementary Table 1. The identification result of 25 compounds.
Number	Retention time	MF	m/z	PPM	Compound	Root	leaf
1	2.98	C9H10O5	197.0444[M-H]-	-3	danshensua	√	×
2	5.36	C9H8O4	179.0339[M-H]-	-2.8	caffeic acida	√	√
3	9.89	C18H16O8	359.0759[M-H]-	-2.2	rosmarinic acida	√	√
4	14.93	C19H24O4	363.1807[M+H]+	0.6	4,6,9-trihydroxy-7-isopropyl-1,1-dimethyl-5,8-dioxo-1,3,4,5,8,9,10,10a-octahydrophenanthrene-4a(2H)-carbaldehyde	×	√
5	15.38	C20H26O6	363.1808[M+H]+	0	4,6,10-trihydroxy-7-isopropyl-1,1-dimethyl-5,8-dioxo-1,3,4,5,8,9,10,10a-octahydrophenanthrene-4a(2H)-carbaldehyde	×	√
6	16.52	C20H26O5	345.1702[M-H]-	0	16-oxhydryl-carnosol	×	√
7	17.07	C20H26O5	345.1695[M-H]-	-2	rosmanol	√	√
8	18.08	C20H26O5	345.1703[M-H]-	0.3	16-oxhydryl-isocarnosol	×	√
9	18.27	C19H20O4	313.1447[M+H]+	2.2	17-oxhydryl-cryptotanshinone	√	×
10	18.88	C20H28O5	347.1854[M-H]-	-1.2	16-oxhydryl-carnosic acid	×	√
11	19.54	C19H22O3	299.1648[M+H]+	-2.3	1,6,6-trimethyl-4,5,6,7,8,9-hexahydrophenanthro[1,2-b]furan-4,11-diol	√	×
12	20.36	C21H28O5	361.2015[M+H]+	0	6-hydroxy-7-isopropyl-9-methoxy-1,1-dimethyl-5,8-dioxo-1,3,4,5,8,9,10,10a-octahydrophenanthrene-4a(2H)-carbaldehyde	√	√
13	20.49	C20H28O4	331.1904[M-H]-	-1.5	11, 20-dihydroxysugiol	√	√
14	20.56	C20H26O4	329.1757[M-H]-	0.4	carnosol	×	√
15	21.38	C20H26O3	315.1967[M+H]+	2.2	1,6,6,9a-tetramethyl-4,5,5a,6,7,8,9,9a-octahydrophenanthro[1,2-b]furan-4,11-diol	√	×
16	21.54	C20H26O3	315.1954[M-H]-	-1.9	11-hydroxysugiol	√	√
17	21.78	C19H20O3	297.1498[M+H]+	2.4	cryptotanshinonea	√	×
18	22.05	C20H28O2	299.2006[M-H]-	-1.7	sugiola	√	√
19	22.72	C20H28O4	331.1911[M-H]-	0.6	carnosic acida	×	√
20	24.35	C20H28O2	301.2170[M+H]+	0.2	1,6,6,9a-tetramethyl-1,2,4,5,5a,6,7,8,9,9a-decahydrophenanthro[1,2-b]furan-11-ol	√	√
21	24.36	C20H30O3	317.2117[M-H]-	0	2-isopropyl-4b,8,8-trimethyl-4b,5,6,7,8,8a,9,10-octahydrophenanthrene-3,4,10-triol	√	√
22	24.73	C19H18O3	295.1337[M+H]+	1	tanshinone IIAa	√	×
23	25.19	C20H26O3	315.1964[M+H]+	1.3	1,6,6,9a-tetramethyl-1,2,4,5,5a,6,7,8,9,9a-decahydrophenanthro[1,2-b]furan-10,11-dione	√	×
24	25.86	C19H22O2	283.1703[M+H]+	1.8	miltironea	√	×
25	29.07	C20H30O2	301.2168[M-H]-	-0.7	11-hydroxyferruginol	√	×
a is defined compounds verified by comparison with reference standards

## Sheet: Supplementary Table 2
Supplementary Table 2. Metabolic markers with a VIP value > 4 obtained from OPLS-DA analysis in the negative-ion mode.
RT(min)	m/z	VIP	Compound
18.044	345.17	16.634	16-oxhydryl-isocarnosol
24.381	317.213	8.87929	20
14.919	361.164	6.27403	4
18.872	273.186	4.75989	16-oxhydryl-carnosic acid
16.531	301.18	4.69097	16-oxhydryl-carnosol
18.077	317.176	4.59767	16-oxhydryl-isocarnosol
22.783	331.191	4.50853	carnosic acid
20.542	285.185	4.40454	carnosol
15.409	361.165	4.34943	5
16.533	345.17	4.20568	16-oxhydryl-carnosol

## Sheet: Supplementary Table 3
Supplementary Table 3. Metabolic markers with a VIP value > 4 obtained from OPLS-DA analysis in the postive-ion mode.
Rt(min)	m/z	VIP	Compound
21.785	297.15	11.5209	cryptotanshinone
18.25	313.144	5.75583	17-oxhydryl-cryptotanshinone
18.056	301.181	5.33436	16-oxhydryl-isocarnosol
18.031	283.17	4.67212	16-oxhydryl-isocarnosol
25.131	315.196	4.10526	23

## Sheet: Supplementary Table 4
Supplementary Table 4. The result of KEGG classification.
Pathway	First Category	Second Category	Pathway_definition	num_of_seqs	seqs_kos/gene_list	pathway_imagename	Hyperlink
map00010	Metabolism	Carbohydrate metabolism	Glycolysis / Gluconeogenesis	599	transcript_373;transcript_415;transcript_484;transcript_671;transcript_681;transcript_687;transcript_710;transcript_766;transcript_900;transcript_949;transcript_950;transcript_955;transcript_971;transcript_999;transcript_1057;transcript_1366;transcript_1901;transcript_2287;transcript_2391;transcript_2646;transcript_3451;transcript_3490;transcript_3613;transcript_3623;transcript_3955;transcript_40…	map00010	http://www.genome.jp/dbget-bin/show_pathway?map00010/K00850%09green/K01689%09green/K14085%09green/K00895%09green/K18857%09green/K03676%09green/K01913%09green/K01623%09green/K01624%09green/K01810%09green/K00873%09green/K00627%09green/K00134%09green/K00131%09green/K01835%09green/K03103%09green/K01895%09green/cpap%09green/K00016%09green/K00844%09green/K01792%09green/K03841%09green/K01610%09green/K00…
map00020	Metabolism	Carbohydrate metabolism	Citrate cycle (TCA cycle)	292	transcript_209;transcript_360;transcript_373;transcript_391;transcript_415;transcript_515;transcript_861;transcript_975;transcript_1366;transcript_1511;transcript_1892;transcript_2113;transcript_2815;transcript_3620;transcript_3812;transcript_4190;transcript_4208;transcript_4899;transcript_5984;transcript_6147;transcript_6217;transcript_6380;transcript_7288;transcript_7725;transcript_8270;transcr…	map00020	http://www.genome.jp/dbget-bin/show_pathway?map00020/K01681%09green/K01648%09green/K00627%09green/K01647%09green/K02954%09green/K01899%09green/K00030%09green/K00031%09green/K00236%09green/K01679%09green/K01900%09green/K01610%09green/qsu%09green/nta%09green/K00658%09green/K00164%09green/K00161%09green/K00162%09green/K00234%09green/K00235%09green/K00382%09green/K00025%09green/K00026%09green
map00030	Metabolism	Carbohydrate metabolism	Pentose phosphate pathway	248	transcript_158;transcript_671;transcript_766;transcript_900;transcript_950;transcript_971;transcript_999;transcript_1899;transcript_2287;transcript_3033;transcript_3508;transcript_4048;transcript_4280;transcript_4727;transcript_5852;transcript_6116;transcript_6412;transcript_7477;transcript_7955;transcript_8492;transcript_9781;transcript_9857;transcript_10241;transcript_10747;transcript_10897;tra…	map00030	http://www.genome.jp/dbget-bin/show_pathway?map00030/K03841%09green/K00850%09green/K00851%09green/K00131%09green/K01835%09green/K00615%09green/K01783%09green/K00895%09green/K00852%09green/K01807%09green/K00948%09green/K01623%09green/K01057%09green/K01810%09green/K00036%09green/K00616%09green/K01624%09green/K01619%09green/K00033%09green
map00040	Metabolism	Carbohydrate metabolism	Pentose and glucuronate interconversions	194	transcript_608;transcript_738;transcript_901;transcript_932;transcript_960;transcript_1045;transcript_2398;transcript_3536;transcript_3621;transcript_4297;transcript_4659;transcript_6160;transcript_7678;transcript_8375;transcript_9196;transcript_12064;transcript_12148;transcript_12195;transcript_12222;transcript_12264;transcript_12279;transcript_12432;transcript_12591;transcript_12678;transcript_…	map00040	http://www.genome.jp/dbget-bin/show_pathway?map00040/K00854%09green/K22935%09green/K00002%09green/K16190%09green/K00963%09green/K02950%09green/K01805%09green/K00008%09green/K01051%09green/K01213%09green/K12447%09green/K01783%09green/K00012%09green/K01728%09green/K01184%09green
map00051	Metabolism	Carbohydrate metabolism	Fructose and mannose metabolism	249	transcript_671;transcript_766;transcript_900;transcript_950;transcript_2287;transcript_2297;transcript_3623;transcript_4010;transcript_4048;transcript_4280;transcript_4727;transcript_5615;transcript_6160;transcript_7477;transcript_7955;transcript_8492;transcript_9178;transcript_9196;transcript_9781;transcript_9857;transcript_10241;transcript_10487;transcript_11383;transcript_11790;transcript_1216…	map00051	http://www.genome.jp/dbget-bin/show_pathway?map00051/K02377%09green/K05305%09green/K00895%09green/nsy%09green/K01623%09green/K01624%09green/K00850%09green/K00863%09green/K18447%09green/K03841%09green/cpap%09green/K17497%09green/K00966%09green/K00847%09green/K00844%09green/K01103%09green/oeu%09green/K01711%09green/K19355%09green/nto%09green/nta%09green/sind%09green/K01809%09green/K01803%09green/K0…
map00052	Metabolism	Carbohydrate metabolism	Galactose metabolism	237	transcript_120;transcript_127;transcript_172;transcript_439;transcript_695;transcript_738;transcript_971;transcript_1901;transcript_2601;transcript_3079;transcript_3169;transcript_3177;transcript_4041;transcript_7678;transcript_8109;transcript_8370;transcript_9178;transcript_9763;transcript_10241;transcript_11475;transcript_12164;transcript_12432;transcript_12503;transcript_12604;transcript_12839…	map00052	http://www.genome.jp/dbget-bin/show_pathway?map00052/K01193%09green/K01190%09green/K00850%09green/K06611%09green/K01187%09green/K00844%09green/K01835%09green/K00963%09green/K18819%09green/K12309%09green/K01785%09green/K01784%09green/K12447%09green/K07407%09green/K00965%09green/K06617%09green
map00053	Metabolism	Carbohydrate metabolism	Ascorbate and aldarate metabolism	209	transcript_738;transcript_2010;transcript_2316;transcript_2542;transcript_2919;transcript_4737;transcript_5278;transcript_6293;transcript_6820;transcript_7678;transcript_8375;transcript_8880;transcript_9215;transcript_9541;transcript_10741;transcript_11077;transcript_12339;transcript_12450;transcript_12459;transcript_12572;transcript_12650;transcript_12670;transcript_12681;transcript_12740;transc…	map00053	http://www.genome.jp/dbget-bin/show_pathway?map00053/K00469%09green/K17744%09green/K18649%09green/K16190%09green/K14190%09green/K08232%09green/K14085%09green/K19642%09green/K03676%09green/K00128%09green/K00225%09green/cit%09green/cpap%09green/K21888%09green/K12447%09green/K00012%09green/K00423%09green/K10046%09green/K10047%09green/K00434%09green
map00500	Metabolism	Carbohydrate metabolism	Starch and sucrose metabolism	472	transcript_16;transcript_30;transcript_44;transcript_82;transcript_116;transcript_124;transcript_137;transcript_203;transcript_285;transcript_372;transcript_448;transcript_461;transcript_695;transcript_698;transcript_798;transcript_971;transcript_999;transcript_1080;transcript_1302;transcript_1685;transcript_2297;transcript_2353;transcript_4010;transcript_5003;transcript_5010;transcript_5750;tran…	map00500	http://www.genome.jp/dbget-bin/show_pathway?map00500/K00703%09green/qsu%09green/K01176%09green/K01177%09green/cann%09green/K01179%09green/K16055%09green/K13679%09green/K01810%09green/K19892%09green/K18447%09green/K00975%09green/K01187%09green/K01210%09green/K01835%09green/K01188%09green/K00963%09green/K00705%09green/K20217%09green/K00688%09green/K05350%09green/K01214%09green/nau%09green/pper%09gr…
map00520	Metabolism	Carbohydrate metabolism	Amino sugar and nucleotide sugar metabolism	506	transcript_130;transcript_215;transcript_225;transcript_254;transcript_738;transcript_814;transcript_936;transcript_971;transcript_999;transcript_2271;transcript_2297;transcript_3079;transcript_3151;transcript_3304;transcript_3366;transcript_3712;transcript_3837;transcript_4497;transcript_4737;transcript_4806;transcript_5395;transcript_5483;transcript_5867;transcript_6583;transcript_7059;transcri…	map00520	http://www.genome.jp/dbget-bin/show_pathway?map00520/K00972%09green/K01836%09green/K02377%09green/qsu%09green/K00975%09green/cann%09green/K05305%09green/K12373%09green/nta%09green/K01810%09green/K00621%09green/nnu%09green/K12451%09green/K12450%09green/K01183%09green/pavi%09green/K16190%09green/K01835%09green/K08679%09green/K00963%09green/K15920%09green/cmos%09green/pper%09green/K00012%09green/nsy…
map00620	Metabolism	Carbohydrate metabolism	Pyruvate metabolism	426	transcript_171;transcript_308;transcript_314;transcript_373;transcript_415;transcript_484;transcript_611;transcript_613;transcript_681;transcript_710;transcript_864;transcript_890;transcript_975;transcript_1057;transcript_1062;transcript_1075;transcript_1366;transcript_1413;transcript_1880;transcript_1892;transcript_2113;transcript_2306;transcript_2577;transcript_3620;transcript_3796;transcript_4…	map00620	http://www.genome.jp/dbget-bin/show_pathway?map00620/K01961%09green/K03676%09green/nsy%09green/K01649%09green/K14085%09green/K00873%09green/K11262%09green/K00627%09green/K00626%09green/K03364%09green/K00051%09green/nto%09green/nau%09green/pper%09green/K01895%09green/pxb%09green/cpap%09green/K00016%09green/K18881%09green/pavi%09green/K01069%09green/K01006%09green/K01679%09green/K01512%09green/K017…
map00630	Metabolism	Carbohydrate metabolism	Glyoxylate and dicarboxylate metabolism	498	transcript_209;transcript_335;transcript_873;transcript_1054;transcript_1154;transcript_1225;transcript_1236;transcript_1272;transcript_1282;transcript_1511;transcript_1582;transcript_1710;transcript_1826;transcript_1892;transcript_1997;transcript_2059;transcript_2113;transcript_2161;transcript_2191;transcript_2218;transcript_2225;transcript_2841;transcript_2948;transcript_3066;transcript_3221;tr…	map00630	http://www.genome.jp/dbget-bin/show_pathway?map00630/K15919%09green/K15918%09green/K11517%09green/K01601%09green/K01681%09green/K00600%09green/K01602%09green/K10393%09green/K00830%09green/K01915%09green/K19269%09green/K00626%09green/K18606%09green/K03781%09green/K01433%09green/K00284%09green/K00281%09green/K01647%09green/K02437%09green/K01895%09green/K02982%09green/K01965%09green/K14272%09green/K…
map00640	Metabolism	Carbohydrate metabolism	Propanoate metabolism	153	transcript_171;transcript_611;transcript_878;transcript_1360;transcript_5041;transcript_6380;transcript_6732;transcript_7130;transcript_7316;transcript_9100;transcript_9752;transcript_11820;transcript_12585;transcript_12689;transcript_18302;transcript_18530;transcript_18606;transcript_18796;transcript_98030;transcript_100622;transcript_70885;transcript_71936;transcript_73419;transcript_74601;tran…	map00640	http://www.genome.jp/dbget-bin/show_pathway?map00640/K01961%09green/K11262%09green/K00626%09green/K01578%09green/K01899%09green/nau%09green/K01895%09green/K00016%09green/oeu%09green/K01692%09green/K01900%09green/K01965%09green/K01963%09green/K01962%09green/K02160%09green/sind%09green/K01968%09green/K00140%09green/K05605%09green/K00166%09green/K00167%09green/K00232%09green/K00382%09green/K09699%09…
map00650	Metabolism	Carbohydrate metabolism	Butanoate metabolism	72	transcript_12070;transcript_12511;transcript_12917;transcript_18302;transcript_73516;transcript_74601;transcript_75264;transcript_76613;transcript_77940;transcript_78587;transcript_80159;transcript_83385;transcript_84056;transcript_84950;transcript_87099;transcript_89088;transcript_90536;transcript_93682;transcript_57074;transcript_58631;transcript_61143;transcript_61461;transcript_61863;transcri…	map00650	http://www.genome.jp/dbget-bin/show_pathway?map00650/K01641%09green/K00074%09green/K17761%09green/K16871%09green/K01640%09green/K18121%09green/K01692%09green/K01913%09green/K01580%09green/K00109%09green/K01653%09green/K01652%09green/K00626%09green
map00660	Metabolism	Carbohydrate metabolism	C5-Branched dibasic acid metabolism	24	transcript_12927;transcript_76149;transcript_76623;transcript_77940;transcript_80159;transcript_83385;transcript_90735;transcript_60487;transcript_61130;transcript_63396;transcript_63657;transcript_48063;transcript_51698;transcript_53112;transcript_21502;transcript_22805;transcript_22992;transcript_23689;transcript_25722;transcript_30478;transcript_31010;transcript_38501;transcript_38861;transcri…	map00660	http://www.genome.jp/dbget-bin/show_pathway?map00660/K01652%09green/K01704%09green/K01703%09green/K01653%09green
map00562	Metabolism	Carbohydrate metabolism	Inositol phosphate metabolism	246	transcript_417;transcript_612;transcript_677;transcript_907;transcript_1100;transcript_2173;transcript_2230;transcript_3623;transcript_5041;transcript_5222;transcript_6025;transcript_6192;transcript_11077;transcript_12173;transcript_12494;transcript_12585;transcript_13006;transcript_13269;transcript_17730;transcript_17786;transcript_97413;transcript_98030;transcript_99245;transcript_103052;transc…	map00562	http://www.genome.jp/dbget-bin/show_pathway?map00562/K19517%09green/K00999%09green/K18649%09green/cann%09green/K01110%09green/K10572%09green/K01114%09green/K21289%09green/K00915%09green/K00914%09green/K01858%09green/K00913%09green/K20279%09green/K01765%09green/K22913%09green/K03103%09green/K21797%09green/K00010%09green/K00469%09green/K03084%09green/K00889%09green/K00888%09green/pavi%09green/K1590…
map00190	Metabolism	Energy metabolism	Oxidative phosphorylation	541	transcript_13;transcript_55;transcript_194;transcript_231;transcript_360;transcript_414;transcript_515;transcript_567;transcript_799;transcript_843;transcript_917;transcript_937;transcript_1021;transcript_1222;transcript_1246;transcript_1262;transcript_1286;transcript_1288;transcript_1315;transcript_1377;transcript_1380;transcript_1421;transcript_1520;transcript_1537;transcript_1555;transcript_16…	map00190	http://www.genome.jp/dbget-bin/show_pathway?map00190/K02113%09green/K02112%09green/K02256%09green/K02257%09green/K02115%09green/K01507%09green/K02258%09green/K02259%09green/K02138%09green/K02261%09green/K03949%09green/K02155%09green/K02154%09green/K02153%09green/K02133%09green/K02151%09green/K02150%09green/K03963%09green/K02262%09green/K03965%09green/btab%09green/K03966%09green/K03943%09green/K03…
map00195	Metabolism	Energy metabolism	Photosynthesis	314	transcript_1257;transcript_1262;transcript_1288;transcript_1397;transcript_1475;transcript_1603;transcript_1806;transcript_1903;transcript_1908;transcript_1910;transcript_1921;transcript_2086;transcript_2126;transcript_2294;transcript_2381;transcript_2463;transcript_2643;transcript_2801;transcript_2901;transcript_3106;transcript_3273;transcript_3314;transcript_3413;transcript_3434;transcript_3633…	map00195	http://www.genome.jp/dbget-bin/show_pathway?map00195/K02694%09green/K02113%09green/K02690%09green/K02692%09green/K02693%09green/K02698%09green/K02699%09green/K02115%09green/K02703%09green/K02701%09green/K02641%09green/K02704%09green/K02112%09green/K02721%09green/K02723%09green/K03541%09green/K02695%09green/K02109%09green/K08906%09green/K08905%09green/K08902%09green/K08903%09green/K14332%09green/K…
map00196	Metabolism	Energy metabolism	Photosynthesis - antenna proteins	216	transcript_1124;transcript_1248;transcript_1312;transcript_1335;transcript_1344;transcript_1384;transcript_1751;transcript_1796;transcript_2118;transcript_2213;transcript_2334;transcript_2517;transcript_2831;transcript_2839;transcript_2933;transcript_2946;transcript_3009;transcript_3133;transcript_3408;transcript_3727;transcript_4229;transcript_4263;transcript_4463;transcript_4739;transcript_4743…	map00196	http://www.genome.jp/dbget-bin/show_pathway?map00196/K08914%09green/K14172%09green/K08908%09green/K08909%09green/K08915%09green/K08907%09green/K08917%09green/K08916%09green/K08911%09green/K08910%09green/K08913%09green/K08912%09green
map00710	Metabolism	Energy metabolism	Carbon fixation in photosynthetic organisms	460	transcript_158;transcript_308;transcript_314;transcript_373;transcript_415;transcript_864;transcript_890;transcript_1131;transcript_1225;transcript_1282;transcript_1582;transcript_1826;transcript_1892;transcript_2059;transcript_2113;transcript_2218;transcript_2287;transcript_2306;transcript_2391;transcript_2577;transcript_2841;transcript_3066;transcript_3221;transcript_3451;transcript_3490;transc…	map00710	http://www.genome.jp/dbget-bin/show_pathway?map00710/K00855%09green/K00615%09green/nsy%09green/K01623%09green/K00814%09green/K01601%09green/pxb%09green/pmum%09green/K00134%09green/K14455%09green/K14454%09green/K00051%09green/K01595%09green/K05298%09green/K00029%09green/pavi%09green/K01006%09green/K01100%09green/oeu%09green/K01624%09green/K03841%09green/K01610%09green/nto%09green/K00927%09green/nt…
map00910	Metabolism	Energy metabolism	Nitrogen metabolism	169	transcript_828;transcript_877;transcript_1002;transcript_2092;transcript_3962;transcript_4132;transcript_5398;transcript_6520;transcript_6525;transcript_6598;transcript_6620;transcript_8291;transcript_8380;transcript_10514;transcript_12215;transcript_12227;transcript_12426;transcript_13201;transcript_14550;transcript_17571;transcript_98287;transcript_68216;transcript_68374;transcript_68888;transc…	map00910	http://www.genome.jp/dbget-bin/show_pathway?map00910/K01673%09green/K00262%09green/K00261%09green/nnu%09green/K01674%09green/cann%09green/K00284%09green/K00264%09green/K02575%09green/oeu%09green/K01725%09green/nsy%09green/K10534%09green/K01915%09green/K00366%09green/sind%09green/K01455%09green
map00920	Metabolism	Energy metabolism	Sulfur metabolism	148	transcript_368;transcript_747;transcript_767;transcript_3682;transcript_4109;transcript_6097;transcript_6129;transcript_9260;transcript_13125;transcript_13469;transcript_17573;transcript_17645;transcript_17646;transcript_17902;transcript_18649;transcript_100824;transcript_68231;transcript_69022;transcript_72695;transcript_73522;transcript_75043;transcript_75149;transcript_76168;transcript_76277;t…	map00920	http://www.genome.jp/dbget-bin/show_pathway?map00920/K15422%09green/K00392%09green/K22966%09green/K00640%09green/K01011%09green/K17725%09green/K13811%09green/K00387%09green/K17285%09green/K22470%09green/pxb%09green/K00860%09green/K13034%09green/K01082%09green/K01738%09green/K01739%09green
map00061	Metabolism	Lipid metabolism	Fatty acid biosynthesis	174	transcript_171;transcript_611;transcript_1664;transcript_1963;transcript_4690;transcript_5016;transcript_5994;transcript_7316;transcript_9671;transcript_9752;transcript_10509;transcript_11369;transcript_12196;transcript_12240;transcript_12596;transcript_18340;transcript_18563;transcript_18756;transcript_68675;transcript_69181;transcript_69927;transcript_70009;transcript_70480;transcript_70799;tra…	map00061	http://www.genome.jp/dbget-bin/show_pathway?map00061/K10781%09green/K02372%09green/K18660%09green/K10782%09green/K01961%09green/K11262%09green/oeu%09green/K00645%09green/K01963%09green/K01962%09green/K02160%09green/nau%09green/K01897%09green/K00648%09green/sind%09green/K09458%09green/K03921%09green/K00208%09green/K07512%09green/K00059%09green
map00062	Metabolism	Lipid metabolism	Fatty acid elongation	65	transcript_4641;transcript_6316;transcript_12754;transcript_18073;transcript_101290;transcript_69449;transcript_71198;transcript_71544;transcript_73327;transcript_73431;transcript_75036;transcript_75095;transcript_76103;transcript_76634;transcript_78641;transcript_79321;transcript_80460;transcript_83418;transcript_83893;transcript_85247;transcript_87876;transcript_89749;transcript_90332;transcrip…	map00062	http://www.genome.jp/dbget-bin/show_pathway?map00062/K01068%09green/K10703%09green/K01074%09green/ccav%09green/K15397%09green/K10258%09green/K07512%09green/K10251%09green
map00071	Metabolism	Lipid metabolism	Fatty acid degradation	225	transcript_179;transcript_1664;transcript_1963;transcript_2646;transcript_4658;transcript_4935;transcript_5528;transcript_6264;transcript_7130;transcript_8915;transcript_9100;transcript_9671;transcript_9705;transcript_9852;transcript_10208;transcript_10741;transcript_10840;transcript_12339;transcript_12572;transcript_12650;transcript_12670;transcript_12740;transcript_12794;transcript_14343;transc…	map00071	http://www.genome.jp/dbget-bin/show_pathway?map00071/K18857%09green/K03676%09green/K14085%09green/K15398%09green/K00626%09green/K00249%09green/K10527%09green/K01897%09green/K07424%09green/K07425%09green/cpap%09green/oeu%09green/K01692%09green/qsu%09green/K13953%09green/K09478%09green/K00001%09green/K00128%09green/K00232%09green/K15401%09green/K00121%09green/K07513%09green/K07517%09green
map00072	Metabolism	Lipid metabolism	Synthesis and degradation of ketone bodies	18	transcript_12511;transcript_12917;transcript_18302;transcript_73516;transcript_74601;transcript_75264;transcript_78587;transcript_90536;transcript_61143;transcript_65883;transcript_48201;transcript_50971;transcript_19266;transcript_24741;transcript_27427;transcript_32623;transcript_34806;transcript_37341	map00072	http://www.genome.jp/dbget-bin/show_pathway?map00072/K01640%09green/K01641%09green/K00626%09green
map00073	Metabolism	Lipid metabolism	Cutin, suberine and wax biosynthesis	43	transcript_466;transcript_1436;transcript_8159;transcript_12794;transcript_17949;transcript_18093;transcript_18637;transcript_98367;transcript_102931;transcript_69059;transcript_69381;transcript_72461;transcript_78206;transcript_80659;transcript_82155;transcript_83975;transcript_89191;transcript_90623;transcript_91040;transcript_91616;transcript_94402;transcript_95201;transcript_95516;transcript_…	map00073	http://www.genome.jp/dbget-bin/show_pathway?map00073/K17991%09green/K13356%09green/K13065%09green/K20769%09green/K15404%09green/K15401%09green/K15400%09green/K15403%09green/K15402%09green/K15398%09green
map00100	Metabolism	Lipid metabolism	Steroid biosynthesis	105	transcript_7500;transcript_8558;transcript_9418;transcript_12337;transcript_12687;transcript_12767;transcript_68900;transcript_70821;transcript_71671;transcript_71841;transcript_73435;transcript_75158;transcript_75384;transcript_77738;transcript_79165;transcript_81020;transcript_82604;transcript_84488;transcript_86887;transcript_88038;transcript_88453;transcript_88759;transcript_89078;transcript_…	map00100	http://www.genome.jp/dbget-bin/show_pathway?map00100/K05917%09green/K23558%09green/K01052%09green/K00801%09green/K00559%09green/K01824%09green/K13120%09green/K00227%09green/K01853%09green/K08242%09green/K00213%09green/K08246%09green/K00511%09green/K14674%09green/K14423%09green/K14424%09green/K00222%09green/K09828%09green
map00561	Metabolism	Lipid metabolism	Glycerolipid metabolism	294	transcript_995;transcript_1441;transcript_2566;transcript_2601;transcript_3169;transcript_3366;transcript_4297;transcript_5017;transcript_6785;transcript_7759;transcript_8370;transcript_8943;transcript_9417;transcript_9602;transcript_10538;transcript_10741;transcript_11178;transcript_12339;transcript_12503;transcript_12572;transcript_12650;transcript_12670;transcript_12740;transcript_12805;transc…	map00561	http://www.genome.jp/dbget-bin/show_pathway?map00561/K14674%09green/K15918%09green/K03715%09green/nta%09green/K00863%09green/K14085%09green/sind%09green/K13519%09green/K09480%09green/K18753%09green/K15728%09green/K07407%09green/K13513%09green/nsy%09green/K22849%09green/K22848%09green/cpap%09green/oeu%09green/K21362%09green/nto%09green/K00901%09green/K22920%09green/K11155%09green/K03676%09green/K0…
map00564	Metabolism	Lipid metabolism	Glycerophospholipid metabolism	318	transcript_85;transcript_262;transcript_1060;transcript_1088;transcript_1441;transcript_2525;transcript_2566;transcript_3862;transcript_3932;transcript_4356;transcript_5426;transcript_5940;transcript_7094;transcript_7308;transcript_7621;transcript_7759;transcript_8326;transcript_8943;transcript_9651;transcript_9969;transcript_11178;transcript_12130;transcript_12166;transcript_12173;transcript_124…	map00564	http://www.genome.jp/dbget-bin/show_pathway?map00564/K14674%09green/K00999%09green/K00995%09green/K00894%09green/K01114%09green/K01115%09green/K22389%09green/K13519%09green/K08730%09green/K15728%09green/K01126%09green/K13511%09green/K13510%09green/K13513%09green/K00111%09green/K00967%09green/K01517%09green/K00968%09green/K00981%09green/K08744%09green/K00993%09green/K01613%09green/K00901%09green/K…
map00565	Metabolism	Lipid metabolism	Ether lipid metabolism	82	transcript_85;transcript_262;transcript_3932;transcript_7308;transcript_12173;transcript_12494;transcript_17730;transcript_68891;transcript_69068;transcript_69635;transcript_69782;transcript_70070;transcript_70683;transcript_72369;transcript_73769;transcript_73884;transcript_74187;transcript_75947;transcript_76602;transcript_79020;transcript_79337;transcript_80608;transcript_81020;transcript_8165…	map00565	http://www.genome.jp/dbget-bin/show_pathway?map00565/K16860%09green/K00993%09green/K01115%09green/K13519%09green/K01114%09green/K13510%09green/K14674%09green
map00600	Metabolism	Lipid metabolism	Sphingolipid metabolism	136	transcript_202;transcript_2601;transcript_3169;transcript_3405;transcript_5685;transcript_6366;transcript_8370;transcript_8984;transcript_12360;transcript_12503;transcript_12538;transcript_12627;transcript_12839;transcript_12899;transcript_17640;transcript_17834;transcript_18510;transcript_97344;transcript_69565;transcript_69908;transcript_70830;transcript_71558;transcript_72508;transcript_75048;…	map00600	http://www.genome.jp/dbget-bin/show_pathway?map00600/K01190%09green/K04718%09green/K17108%09green/K12309%09green/oeu%09green/K04713%09green/K04712%09green/K04711%09green/K01201%09green/K00654%09green/K07407%09green/K01634%09green/K04708%09green/cpap%09green/K12349%09green/K23727%09green
map00590	Metabolism	Lipid metabolism	Arachidonic acid metabolism	43	transcript_10840;transcript_97518;transcript_68472;transcript_69001;transcript_69242;transcript_69645;transcript_71468;transcript_72616;transcript_73250;transcript_74631;transcript_75379;transcript_79870;transcript_81020;transcript_84645;transcript_88627;transcript_88773;transcript_92989;transcript_93215;transcript_93593;transcript_94481;transcript_96034;transcript_56147;transcript_60140;transcri…	map00590	http://www.genome.jp/dbget-bin/show_pathway?map00590/K05309%09green/K01254%09green/K00079%09green/K18592%09green/K00681%09green/oeu%09green/qsu%09green/K00432%09green/K14674%09green/K07424%09green/K07425%09green
map00591	Metabolism	Lipid metabolism	Linoleic acid metabolism	47	transcript_3347;transcript_4194;transcript_13431;transcript_100905;transcript_107611;transcript_68281;transcript_70223;transcript_73135;transcript_76313;transcript_77750;transcript_78375;transcript_81020;transcript_82994;transcript_83059;transcript_88346;transcript_90700;transcript_94438;transcript_95428;transcript_96596;transcript_59515;transcript_60123;transcript_61531;transcript_61607;transcri…	map00591	http://www.genome.jp/dbget-bin/show_pathway?map00591/cpap%09green/oeu%09green/K00454%09green/K15718%09green/qsu%09green/K14674%09green/K07424%09green/K07425%09green
map00592	Metabolism	Lipid metabolism	alpha-Linolenic acid metabolism	162	transcript_179;transcript_1060;transcript_3347;transcript_7130;transcript_7259;transcript_7621;transcript_9100;transcript_9705;transcript_12130;transcript_12166;transcript_14343;transcript_17821;transcript_18157;transcript_18606;transcript_100622;transcript_100905;transcript_107611;transcript_68281;transcript_68880;transcript_69124;transcript_69582;transcript_69661;transcript_70962;transcript_709…	map00592	http://www.genome.jp/dbget-bin/show_pathway?map00592/oeu%09green/K14674%09green/K00224%09green/K01723%09green/K05894%09green/pxb%09green/K18857%09green/ccav%09green/K00232%09green/K00454%09green/K22389%09green/K10527%09green/K10526%09green/K10525%09green/K07513%09green/K10528%09green
map01040	Metabolism	Lipid metabolism	Biosynthesis of unsaturated fatty acids	91	transcript_4641;transcript_7130;transcript_9100;transcript_10509;transcript_17821;transcript_18073;transcript_18157;transcript_18606;transcript_18756;transcript_100622;transcript_69449;transcript_70962;transcript_73327;transcript_74420;transcript_75036;transcript_76103;transcript_76498;transcript_76525;transcript_76634;transcript_83418;transcript_85317;transcript_86692;transcript_89749;transcript…	map01040	http://www.genome.jp/dbget-bin/show_pathway?map01040/K01068%09green/K10703%09green/K08764%09green/ccav%09green/K00232%09green/K10258%09green/K10256%09green/K07513%09green/K03921%09green/K10251%09green
map00230	Metabolism	Nucleotide metabolism	Purine metabolism	416	transcript_23;transcript_356;transcript_484;transcript_560;transcript_681;transcript_710;transcript_913;transcript_927;transcript_971;transcript_1057;transcript_1091;transcript_1376;transcript_1532;transcript_1944;transcript_2060;transcript_2265;transcript_3103;transcript_3550;transcript_3682;transcript_4010;transcript_4716;transcript_4987;transcript_5294;transcript_5359;transcript_5676;transcrip…	map00230	http://www.genome.jp/dbget-bin/show_pathway?map00230/K00856%09green/K00939%09green/K00088%09green/K13987%09green/K06928%09green/K01466%09green/K01923%09green/K00760%09green/K00602%09green/bvg%09green/K01939%09green/K00764%09green/K00951%09green/K00873%09green/K01951%09green/K18151%09green/K01933%09green/K18447%09green/K03787%09green/K01835%09green/K01952%09green/K13293%09green/K01427%09green/K010…
map00240	Metabolism	Nucleotide metabolism	Pyrimidine metabolism	208	transcript_913;transcript_927;transcript_1532;transcript_3550;transcript_6338;transcript_6890;transcript_7449;transcript_7593;transcript_7698;transcript_8693;transcript_8838;transcript_9072;transcript_10027;transcript_12777;transcript_13131;transcript_13946;transcript_18072;transcript_18212;transcript_18224;transcript_18242;transcript_98146;transcript_100021;transcript_68447;transcript_68477;tran…	map00240	http://www.genome.jp/dbget-bin/show_pathway?map00240/K00857%09green/cann%09green/K01240%09green/K01464%09green/K00761%09green/bvg%09green/K00609%09green/K01937%09green/K00876%09green/K13800%09green/K16904%09green/K03787%09green/K01956%09green/K01955%09green/K00207%09green/K01493%09green/K01081%09green/K09903%09green/K13998%09green/K18677%09green/K16329%09green/K01513%09green/K01510%09green/qsu%09…
map00250	Metabolism	Amino acid metabolism	Alanine, aspartate and glutamate metabolism	249	transcript_762;transcript_1826;transcript_2911;transcript_4003;transcript_4532;transcript_4551;transcript_4880;transcript_5057;transcript_5227;transcript_5867;transcript_6317;transcript_6338;transcript_7059;transcript_7120;transcript_8024;transcript_8172;transcript_8380;transcript_9149;transcript_10082;transcript_12070;transcript_12153;transcript_12227;transcript_12262;transcript_12379;transcript…	map00250	http://www.genome.jp/dbget-bin/show_pathway?map00250/K00830%09green/K17761%09green/cann%09green/K13051%09green/K00811%09green/K00814%09green/K01939%09green/K00764%09green/K01915%09green/K00609%09green/nnu%09green/K00262%09green/K00261%09green/K14455%09green/K14454%09green/K00264%09green/K01956%09green/K01955%09green/K16871%09green/K01953%09green/K01755%09green/K01756%09green/oeu%09green/K00827%09…
map00260	Metabolism	Amino acid metabolism	Glycine, serine and threonine metabolism	321	transcript_74;transcript_282;transcript_335;transcript_743;transcript_867;transcript_955;transcript_1154;transcript_1272;transcript_1826;transcript_2161;transcript_2225;transcript_2592;transcript_2948;transcript_3252;transcript_3782;transcript_3955;transcript_4532;transcript_6317;transcript_6572;transcript_7120;transcript_7188;transcript_8172;transcript_8473;transcript_9149;transcript_10082;trans…	map00260	http://www.genome.jp/dbget-bin/show_pathway?map00260/K01079%09green/K15919%09green/K15918%09green/K14085%09green/K06001%09green/K00600%09green/K00605%09green/K10393%09green/K00830%09green/K00831%09green/K00872%09green/K18606%09green/K00058%09green/K00130%09green/K01834%09green/K00281%09green/K02437%09green/K01754%09green/K00108%09green/K01695%09green/cpap%09green/K01696%09green/K00827%09green/K14…
map00270	Metabolism	Amino acid metabolism	Cysteine and methionine metabolism	503	transcript_112;transcript_251;transcript_368;transcript_503;transcript_743;transcript_747;transcript_767;transcript_789;transcript_792;transcript_867;transcript_1662;transcript_1892;transcript_2113;transcript_2236;transcript_2563;transcript_2705;transcript_2911;transcript_3558;transcript_3620;transcript_3829;transcript_4003;transcript_4109;transcript_4506;transcript_4515;transcript_4532;transcrip…	map00270	http://www.genome.jp/dbget-bin/show_pathway?map00270/K00899%09green/K00133%09green/K01244%09green/K16054%09green/K01011%09green/K00811%09green/K00815%09green/K00831%09green/K01761%09green/K01760%09green/K01762%09green/K21456%09green/K00058%09green/K14454%09green/K22207%09green/K00640%09green/K00547%09green/K12524%09green/K00789%09green/K17398%09green/K00016%09green/K00549%09green/K01919%09green/c…
map00280	Metabolism	Amino acid metabolism	Valine, leucine and isoleucine degradation	237	transcript_878;transcript_1360;transcript_4532;transcript_5041;transcript_6317;transcript_6352;transcript_6732;transcript_7968;transcript_8914;transcript_9149;transcript_9869;transcript_10082;transcript_10208;transcript_10567;transcript_10741;transcript_11820;transcript_11847;transcript_12339;transcript_12404;transcript_12511;transcript_12572;transcript_12585;transcript_12650;transcript_12670;tra…	map00280	http://www.genome.jp/dbget-bin/show_pathway?map00280/K18660%09green/K03676%09green/K14085%09green/K01640%09green/K01641%09green/K00626%09green/K00249%09green/cpap%09green/K01692%09green/K01965%09green/K00826%09green/nta%09green/K01969%09green/K01968%09green/K00140%09green/K09478%09green/K05607%09green/K05605%09green/K00166%09green/K00167%09green/K00827%09green/K00128%09green/K00382%09green/K00253…
map00290	Metabolism	Amino acid metabolism	Valine, leucine and isoleucine biosynthesis	70	transcript_613;transcript_893;transcript_9869;transcript_12927;transcript_17945;transcript_68400;transcript_69220;transcript_69374;transcript_74553;transcript_75551;transcript_76149;transcript_76623;transcript_77332;transcript_77940;transcript_78516;transcript_80159;transcript_80593;transcript_83385;transcript_83740;transcript_84871;transcript_87871;transcript_88565;transcript_90369;transcript_90…	map00290	http://www.genome.jp/dbget-bin/show_pathway?map00290/K01754%09green/K01652%09green/K01687%09green/K00053%09green/K00826%09green/nta%09green/K01649%09green/K01653%09green/K01704%09green/K01703%09green
map00300	Metabolism	Amino acid metabolism	Lysine biosynthesis	50	transcript_3378;transcript_7727;transcript_17562;transcript_17654;transcript_17856;transcript_18183;transcript_80766;transcript_83189;transcript_86609;transcript_87547;transcript_88290;transcript_96491;transcript_58955;transcript_58974;transcript_59799;transcript_61644;transcript_63684;transcript_64264;transcript_64938;transcript_43031;transcript_45816;transcript_45818;transcript_45895;transcript…	map00300	http://www.genome.jp/dbget-bin/show_pathway?map00300/K10206%09green/K01586%09green/K01778%09green/K00215%09green/K01714%09green/K12524%09green/K05824%09green/K00928%09green/K00133%09green
map00310	Metabolism	Amino acid metabolism	Lysine degradation	137	transcript_5474;transcript_5895;transcript_5984;transcript_6147;transcript_6943;transcript_10741;transcript_12339;transcript_12572;transcript_12650;transcript_12670;transcript_12689;transcript_12740;transcript_13036;transcript_18302;transcript_68996;transcript_69996;transcript_70459;transcript_70640;transcript_70694;transcript_71460;transcript_72644;transcript_73903;transcript_74601;transcript_75…	map00310	http://www.genome.jp/dbget-bin/show_pathway?map00310/nau%09green/K00128%09green/K11422%09green/K18826%09green/K00658%09green/K14157%09green/cpap%09green/K14085%09green/K03676%09green/K11423%09green/nsy%09green/K11420%09green/K11430%09green/K11426%09green/K00382%09green/K11433%09green/K01692%09green/K22748%09green/K00626%09green
map00220	Metabolism	Amino acid metabolism	Arginine biosynthesis	146	transcript_1826;transcript_2911;transcript_4003;transcript_4880;transcript_5057;transcript_6246;transcript_8024;transcript_8172;transcript_8380;transcript_12691;transcript_12828;transcript_12849;transcript_13034;transcript_17899;transcript_18033;transcript_18245;transcript_18595;transcript_68216;transcript_68551;transcript_69600;transcript_70221;transcript_71401;transcript_71864;transcript_72180;…	map00220	http://www.genome.jp/dbget-bin/show_pathway?map00220/K14272%09green/K00811%09green/K00814%09green/K01915%09green/K00818%09green/K00620%09green/K01427%09green/K00930%09green/K00262%09green/K00261%09green/K14455%09green/K14454%09green/K14677%09green/K01755%09green/K01438%09green/K01476%09green/nta%09green/cic%09green/K00145%09green/K01940%09green/K00611%09green/K14682%09green/cit%09green/K13427%09g…
map00330	Metabolism	Amino acid metabolism	Arginine and proline metabolism	196	transcript_31;transcript_2911;transcript_4003;transcript_4794;transcript_5057;transcript_5767;transcript_6605;transcript_7771;transcript_8394;transcript_10741;transcript_12076;transcript_12339;transcript_12512;transcript_12572;transcript_12650;transcript_12670;transcript_12740;transcript_12818;transcript_12860;transcript_13033;transcript_13101;transcript_17539;transcript_17652;transcript_17703;tr…	map00330	http://www.genome.jp/dbget-bin/show_pathway?map00330/K12259%09green/K12251%09green/K03676%09green/K00811%09green/K01583%09green/K14085%09green/K00819%09green/K01426%09green/K00318%09green/K12657%09green/K17839%09green/K14455%09green/K14454%09green/K00286%09green/K00472%09green/K01259%09green/cpap%09green/K01476%09green/K01611%09green/cic%09green/K00294%09green/K00128%09green/K10536%09green/cit%09…
map00340	Metabolism	Amino acid metabolism	Histidine metabolism	83	transcript_951;transcript_1822;transcript_10741;transcript_12339;transcript_12514;transcript_12572;transcript_12650;transcript_12670;transcript_12740;transcript_12965;transcript_100271;transcript_68996;transcript_70459;transcript_70694;transcript_72505;transcript_73413;transcript_73903;transcript_79389;transcript_79970;transcript_82821;transcript_82848;transcript_84609;transcript_85296;transcript…	map00340	http://www.genome.jp/dbget-bin/show_pathway?map00340/K18649%09green/K01663%09green/K11755%09green/cpap%09green/K14085%09green/oeu%09green/K03676%09green/K00128%09green/K01814%09green/K00765%09green/K01693%09green/K01590%09green/K00817%09green/K00013%09green/K19787%09green
map00350	Metabolism	Amino acid metabolism	Tyrosine metabolism	173	transcript_74;transcript_282;transcript_1935;transcript_2592;transcript_2646;transcript_2911;transcript_3910;transcript_4003;transcript_4658;transcript_4935;transcript_5057;transcript_5528;transcript_5797;transcript_6264;transcript_6572;transcript_8915;transcript_9705;transcript_9852;transcript_10763;transcript_12140;transcript_12968;transcript_14343;transcript_17686;transcript_18245;transcript_1…	map00350	http://www.genome.jp/dbget-bin/show_pathway?map00350/K15919%09green/K18857%09green/K00811%09green/K00815%09green/K00817%09green/K07253%09green/K18606%09green/K14455%09green/K14454%09green/K01557%09green/K01555%09green/K00422%09green/cit%09green/K15849%09green/oeu%09green/K01593%09green/K13953%09green/cic%09green/K00276%09green/K00001%09green/K01800%09green/K00451%09green/K00457%09green/K00121%09g…
map00360	Metabolism	Amino acid metabolism	Phenylalanine metabolism	130	transcript_74;transcript_232;transcript_273;transcript_282;transcript_2592;transcript_2857;transcript_2911;transcript_3910;transcript_4003;transcript_5057;transcript_5797;transcript_6572;transcript_8391;transcript_10476;transcript_10763;transcript_12968;transcript_17686;transcript_18019;transcript_18245;transcript_18595;transcript_98101;transcript_100271;transcript_68317;transcript_70568;transcri…	map00360	http://www.genome.jp/dbget-bin/show_pathway?map00360/cic%09green/K00276%09green/K00074%09green/K10775%09green/K15919%09green/K00815%09green/K00817%09green/K15849%09green/oeu%09green/K01692%09green/K00811%09green/cit%09green/K01593%09green/K00457%09green/K07253%09green/K14455%09green/K01426%09green/K18606%09green/K14454%09green
map00380	Metabolism	Amino acid metabolism	Tryptophan metabolism	200	transcript_1997;transcript_3327;transcript_4476;transcript_5984;transcript_6147;transcript_9790;transcript_10741;transcript_12320;transcript_12339;transcript_12556;transcript_12572;transcript_12650;transcript_12670;transcript_12689;transcript_12740;transcript_17686;transcript_18062;transcript_18296;transcript_18302;transcript_97691;transcript_98101;transcript_68996;transcript_70459;transcript_706…	map00380	http://www.genome.jp/dbget-bin/show_pathway?map00380/K03781%09green/K11816%09green/K00453%09green/K00382%09green/K00658%09green/K22450%09green/cpap%09green/K03676%09green/K00128%09green/K00837%09green/K23947%09green/K16903%09green/K00486%09green/K01593%09green/K07408%09green/K14085%09green/K01692%09green/K01426%09green/K00626%09green
map00400	Metabolism	Amino acid metabolism	Phenylalanine, tyrosine and tryptophan biosynthesis	187	transcript_863;transcript_2911;transcript_4003;transcript_4069;transcript_4800;transcript_5057;transcript_6770;transcript_7958;transcript_12094;transcript_12110;transcript_12292;transcript_12574;transcript_12800;transcript_12863;transcript_13042;transcript_17565;transcript_17771;transcript_17799;transcript_18245;transcript_18523;transcript_18542;transcript_18595;transcript_18713;transcript_18769;…	map00400	http://www.genome.jp/dbget-bin/show_pathway?map00400/K00891%09green/K01817%09green/K00811%09green/K00766%09green/K00815%09green/K01626%09green/K00817%09green/K01850%09green/K01609%09green/K14455%09green/K14454%09green/K14288%09green/K05359%09green/K01695%09green/K01696%09green/K15849%09green/oeu%09green/K01736%09green/K01658%09green/K01735%09green/K13832%09green/nta%09green/K01657%09green/K00800%…
map00410	Metabolism	Metabolism of other amino acids	beta-Alanine metabolism	173	transcript_74;transcript_282;transcript_1360;transcript_2592;transcript_5041;transcript_6572;transcript_6605;transcript_6732;transcript_7130;transcript_8394;transcript_8693;transcript_9100;transcript_10741;transcript_11820;transcript_12076;transcript_12339;transcript_12512;transcript_12572;transcript_12585;transcript_12650;transcript_12670;transcript_12740;transcript_12968;transcript_18530;transc…	map00410	http://www.genome.jp/dbget-bin/show_pathway?map00410/K00276%09green/K17839%09green/K12259%09green/K05605%09green/cpap%09green/K00207%09green/K00140%09green/K03676%09green/K00128%09green/K00232%09green/K01578%09green/K01580%09green/K14085%09green/K01431%09green/K01918%09green/K01692%09green/K01464%09green
map00430	Metabolism	Metabolism of other amino acids	Taurine and hypotaurine metabolism	22	transcript_68593;transcript_74234;transcript_75379;transcript_80485;transcript_84056;transcript_84645;transcript_85987;transcript_87099;transcript_93215;transcript_93593;transcript_57074;transcript_60140;transcript_47468;transcript_50268;transcript_51046;transcript_52580;transcript_54130;transcript_54391;transcript_55225;transcript_29464;transcript_29751;transcript_35694	map00430	http://www.genome.jp/dbget-bin/show_pathway?map00430/K10712%09green/K00681%09green/K23953%09green/K18592%09green/K01580%09green
map00440	Metabolism	Metabolism of other amino acids	Phosphonate and phosphinate metabolism	33	transcript_3862;transcript_5426;transcript_18133;transcript_68849;transcript_69635;transcript_70683;transcript_72369;transcript_73154;transcript_74754;transcript_75921;transcript_78410;transcript_78973;transcript_79625;transcript_83661;transcript_86078;transcript_87963;transcript_57345;transcript_58238;transcript_61272;transcript_61537;transcript_64559;transcript_64626;transcript_64923;transcript…	map00440	http://www.genome.jp/dbget-bin/show_pathway?map00440/K00967%09green/K00968%09green/K00993%09green
map00450	Metabolism	Metabolism of other amino acids	Selenocompound metabolism	114	transcript_112;transcript_150;transcript_251;transcript_368;transcript_767;transcript_789;transcript_3682;transcript_4506;transcript_6466;transcript_8793;transcript_9260;transcript_10193;transcript_12170;transcript_12762;transcript_13125;transcript_13469;transcript_17645;transcript_17646;transcript_17902;transcript_18061;transcript_18101;transcript_18649;transcript_18688;transcript_18748;transcri…	map00450	http://www.genome.jp/dbget-bin/show_pathway?map00450/K08247%09green/nsy%09green/K01761%09green/oeu%09green/K00384%09green/K13811%09green/K01874%09green/K11717%09green/nta%09green/K01760%09green/sind%09green/K00549%09green/nto%09green/K01739%09green
map00460	Metabolism	Metabolism of other amino acids	Cyanoamino acid metabolism	182	transcript_203;transcript_448;transcript_698;transcript_1080;transcript_1272;transcript_2161;transcript_6884;transcript_7850;transcript_9476;transcript_10426;transcript_11208;transcript_12097;transcript_12327;transcript_12618;transcript_12702;transcript_12763;transcript_12902;transcript_12999;transcript_13025;transcript_17530;transcript_17577;transcript_17864;transcript_17889;transcript_18103;tra…	map00460	http://www.genome.jp/dbget-bin/show_pathway?map00460/qsu%09green/cann%09green/K00600%09green/K10393%09green/pxb%09green/sind%09green/K01188%09green/K05350%09green/nau%09green/K00681%09green/pper%09green/pavi%09green/oeu%09green/ccaj%09green/K18592%09green/nto%09green/nta%09green/K01455%09green/K05349%09green/K13051%09green/pmum%09green/K13034%09green/K13035%09green
map00480	Metabolism	Metabolism of other amino acids	Glutathione metabolism	261	transcript_20;transcript_607;transcript_792;transcript_1089;transcript_1234;transcript_1324;transcript_1624;transcript_2097;transcript_2518;transcript_2542;transcript_2815;transcript_2959;transcript_5278;transcript_6116;transcript_6412;transcript_6629;transcript_6820;transcript_8270;transcript_8753;transcript_9215;transcript_9541;transcript_9736;transcript_10781;transcript_12461;transcript_12505;…	map00480	http://www.genome.jp/dbget-bin/show_pathway?map00480/pvu%09green/K05360%09green/K01919%09green/K01469%09green/K21456%09green/K00799%09green/K00681%09green/K00033%09green/K00031%09green/K21888%09green/K01255%09green/K01256%09green/K18592%09green/K00797%09green/qsu%09green/K00036%09green/K10808%09green/K00383%09green/K00432%09green/K10807%09green/K00434%09green/K22596%09green
map00510	Metabolism	Glycan biosynthesis and metabolism	N-Glycan biosynthesis	174	transcript_154;transcript_236;transcript_457;transcript_3477;transcript_3581;transcript_4282;transcript_4784;transcript_4795;transcript_5022;transcript_5368;transcript_5793;transcript_6155;transcript_6902;transcript_8919;transcript_9101;transcript_9187;transcript_11714;transcript_11972;transcript_12243;transcript_12901;transcript_17586;transcript_17907;transcript_17942;transcript_18576;transcript…	map00510	http://www.genome.jp/dbget-bin/show_pathway?map00510/K12670%09green/K03845%09green/K07252%09green/K23741%09green/K03842%09green/K03843%09green/K07441%09green/K03846%09green/K03844%09green/K00729%09green/K00726%09green/K03848%09green/K03849%09green/K00721%09green/K07151%09green/K12345%09green/K05546%09green/K01231%09green/K01230%09green/K01001%09green/K12666%09green/K12667%09green/K12668%09green/K…
map00513	Metabolism	Glycan biosynthesis and metabolism	Various types of N-glycan biosynthesis	137	transcript_154;transcript_236;transcript_457;transcript_994;transcript_3151;transcript_3477;transcript_4282;transcript_4784;transcript_5022;transcript_5368;transcript_5793;transcript_6155;transcript_6902;transcript_8919;transcript_9101;transcript_9187;transcript_11972;transcript_12243;transcript_12363;transcript_17586;transcript_17907;transcript_18663;transcript_70477;transcript_70865;transcript_…	map00513	http://www.genome.jp/dbget-bin/show_pathway?map00513/K12670%09green/K12373%09green/K03714%09green/K23741%09green/K03842%09green/K03843%09green/K07441%09green/K03846%09green/K03844%09green/K03845%09green/K00726%09green/K07151%09green/K01231%09green/K01230%09green/K14413%09green/K14412%09green/K12666%09green/K12667%09green/K12668%09green/K12669%09green/K00717%09green/qsu%09green/K00753%09green/K074…
map00515	Metabolism	Glycan biosynthesis and metabolism	Mannose type O-glycan biosynthesis	6	transcript_82614;transcript_95272;transcript_55849;transcript_42569;transcript_47789;transcript_34584	map00515	http://www.genome.jp/dbget-bin/show_pathway?map00515/K18134%09green/K18207%09green/oeu%09green
map00514	Metabolism	Glycan biosynthesis and metabolism	Other types of O-glycan biosynthesis	52	transcript_6958;transcript_8305;transcript_17543;transcript_68357;transcript_73983;transcript_76059;transcript_79003;transcript_84289;transcript_88177;transcript_92293;transcript_94867;transcript_95272;transcript_55725;transcript_55849;transcript_56064;transcript_58254;transcript_58442;transcript_61708;transcript_61848;transcript_63234;transcript_64601;transcript_65594;transcript_67802;transcript…	map00514	http://www.genome.jp/dbget-bin/show_pathway?map00514/K20782%09green/K20783%09green/K18207%09green/K20784%09green/K03691%09green/K05948%09green/K18134%09green/cic%09green/oeu%09green/K20781%09green/cit%09green/K09667%09green
map00531	Metabolism	Glycan biosynthesis and metabolism	Glycosaminoglycan degradation	39	transcript_2728;transcript_3151;transcript_12363;transcript_12801;transcript_101386;transcript_68974;transcript_69033;transcript_75741;transcript_79927;transcript_87602;transcript_90816;transcript_94687;transcript_59125;transcript_59935;transcript_60209;transcript_61013;transcript_65451;transcript_66165;transcript_44864;transcript_45644;transcript_49916;transcript_50724;transcript_50884;transcrip…	map00531	http://www.genome.jp/dbget-bin/show_pathway?map00531/cann%09green/K07964%09green/K12373%09green/K10532%09green/K12309%09green/K01205%09green
map00563	Metabolism	Glycan biosynthesis and metabolism	Glycosylphosphatidylinositol (GPI)-anchor biosynthesis	62	transcript_493;transcript_3209;transcript_5176;transcript_5608;transcript_5953;transcript_10422;transcript_12229;transcript_102147;transcript_70982;transcript_71351;transcript_71845;transcript_74156;transcript_74220;transcript_75114;transcript_77760;transcript_79623;transcript_81787;transcript_84350;transcript_86402;transcript_87272;transcript_90080;transcript_91501;transcript_55599;transcript_56…	map00563	http://www.genome.jp/dbget-bin/show_pathway?map00563/K05285%09green/K07542%09green/K03857%09green/K03859%09green/K03860%09green/K07541%09green/K11001%09green/K03861%09green/K05283%09green/K05294%09green/K05288%09green/K05289%09green/K05286%09green/K05287%09green/K05284%09green/K03858%09green/K05291%09green/K05290%09green/K05293%09green/K05292%09green
map00601	Metabolism	Glycan biosynthesis and metabolism	Glycosphingolipid biosynthesis - lacto and neolacto series	1	transcript_42414	map00601	http://www.genome.jp/dbget-bin/show_pathway?map00601/K01988%09green/pxb%09green
map00603	Metabolism	Glycan biosynthesis and metabolism	Glycosphingolipid biosynthesis - globo and isoglobo series	69	transcript_2601;transcript_3151;transcript_3169;transcript_8370;transcript_12363;transcript_12503;transcript_12839;transcript_12899;transcript_17640;transcript_17834;transcript_18510;transcript_75048;transcript_77976;transcript_78214;transcript_81693;transcript_84658;transcript_85019;transcript_85127;transcript_90816;transcript_92396;transcript_96492;transcript_55349;transcript_60209;transcript_6…	map00603	http://www.genome.jp/dbget-bin/show_pathway?map00603/K07407%09green/pxb%09green/K12373%09green/K01988%09green
map00604	Metabolism	Glycan biosynthesis and metabolism	Glycosphingolipid biosynthesis - ganglio series	14	transcript_3151;transcript_12363;transcript_90816;transcript_60209;transcript_65451;transcript_66165;transcript_21313;transcript_22352;transcript_24030;transcript_25201;transcript_27203;transcript_28863;transcript_31720;transcript_38263	map00604	http://www.genome.jp/dbget-bin/show_pathway?map00604/K12309%09green/K12373%09green
map00511	Metabolism	Glycan biosynthesis and metabolism	Other glycan degradation	71	transcript_3151;transcript_3405;transcript_8530;transcript_12363;transcript_12627;transcript_97344;transcript_69908;transcript_70830;transcript_71558;transcript_82635;transcript_85364;transcript_86097;transcript_87084;transcript_90816;transcript_91031;transcript_95208;transcript_57332;transcript_57641;transcript_57752;transcript_58850;transcript_59064;transcript_59536;transcript_60209;transcript_…	map00511	http://www.genome.jp/dbget-bin/show_pathway?map00511/K01190%09green/K01191%09green/K15923%09green/K00522%09green/K17108%09green/K12373%09green/oeu%09green/K12309%09green/K01201%09green/K01206%09green/qsu%09green/K01444%09green/K01227%09green
map00730	Metabolism	Metabolism of cofactors and vitamins	Thiamine metabolism	124	transcript_1948;transcript_2164;transcript_2265;transcript_3043;transcript_3673;transcript_4732;transcript_10127;transcript_99355;transcript_99661;transcript_99688;transcript_68178;transcript_68673;transcript_69082;transcript_69143;transcript_69859;transcript_71134;transcript_71938;transcript_72750;transcript_73251;transcript_73724;transcript_73878;transcript_74031;transcript_75118;transcript_757…	map00730	http://www.genome.jp/dbget-bin/show_pathway?map00730/K04487%09green/K20896%09green/K03147%09green/K03146%09green/K01662%09green/K06928%09green/K00878%09green/K14153%09green/oeu%09green/K00939%09green/K00949%09green/K22911%09green/K06949%09green
map00740	Metabolism	Metabolism of cofactors and vitamins	Riboflavin metabolism	38	transcript_4987;transcript_13039;transcript_69838;transcript_74040;transcript_75949;transcript_77018;transcript_81701;transcript_84977;transcript_87878;transcript_88826;transcript_90318;transcript_90557;transcript_91661;transcript_97230;transcript_57742;transcript_58070;transcript_59893;transcript_61381;transcript_61549;transcript_63047;transcript_64200;transcript_66501;transcript_43300;transcrip…	map00740	http://www.genome.jp/dbget-bin/show_pathway?map00740/K20884%09green/K20860%09green/K14652%09green/K18453%09green/K14379%09green/K22949%09green/K01513%09green/oeu%09green/K11752%09green/K18677%09green/K00794%09green/K00793%09green/K22912%09green
map00750	Metabolism	Metabolism of cofactors and vitamins	Vitamin B6 metabolism	55	transcript_2971;transcript_9194;transcript_17987;transcript_68590;transcript_68619;transcript_69269;transcript_69654;transcript_71618;transcript_71908;transcript_74295;transcript_74706;transcript_78161;transcript_80297;transcript_81198;transcript_81827;transcript_82785;transcript_85501;transcript_86996;transcript_88906;transcript_89358;transcript_93492;transcript_93707;transcript_94117;transcript…	map00750	http://www.genome.jp/dbget-bin/show_pathway?map00750/K08681%09green/K00275%09green/K06215%09green/K00868%09green/K13248%09green/K01733%09green/K05275%09green/K00831%09green/K23998%09green
map00760	Metabolism	Metabolism of cofactors and vitamins	Nicotinate and nicotinamide metabolism	67	transcript_284;transcript_2165;transcript_7938;transcript_100021;transcript_69294;transcript_71815;transcript_73157;transcript_74061;transcript_76341;transcript_79112;transcript_80817;transcript_81774;transcript_86547;transcript_86575;transcript_86905;transcript_88103;transcript_91661;transcript_94581;transcript_95711;transcript_95987;transcript_96977;transcript_56650;transcript_56913;transcript_…	map00760	http://www.genome.jp/dbget-bin/show_pathway?map00760/oeu%09green/K18551%09green/K12410%09green/K06210%09green/K18677%09green/K03787%09green/K00278%09green/K00858%09green/K01513%09green/K01240%09green/K11415%09green/K00763%09green/K01950%09green/K08281%09green/K00767%09green/K11416%09green/K01081%09green/K03426%09green/K03517%09green
map00770	Metabolism	Metabolism of cofactors and vitamins	Pantothenate and CoA biosynthesis	86	transcript_893;transcript_8693;transcript_9869;transcript_17945;transcript_71001;transcript_72111;transcript_73422;transcript_74553;transcript_77332;transcript_77940;transcript_78516;transcript_80159;transcript_83385;transcript_83740;transcript_83832;transcript_84871;transcript_86525;transcript_87213;transcript_87356;transcript_87871;transcript_88019;transcript_88565;transcript_90369;transcript_9…	map00770	http://www.genome.jp/dbget-bin/show_pathway?map00770/K00859%09green/K18677%09green/K01687%09green/K01513%09green/K06133%09green/K00053%09green/K01431%09green/K01464%09green/K00826%09green/K02201%09green/K09680%09green/K00207%09green/nta%09green/K01922%09green/K01918%09green/K01652%09green/K01653%09green/K01598%09green
map00780	Metabolism	Metabolism of cofactors and vitamins	Biotin metabolism	58	transcript_4690;transcript_5016;transcript_5994;transcript_11369;transcript_12196;transcript_70009;transcript_70301;transcript_70799;transcript_74625;transcript_75658;transcript_76728;transcript_77402;transcript_78256;transcript_79423;transcript_80571;transcript_80854;transcript_86242;transcript_87218;transcript_87471;transcript_88440;transcript_89835;transcript_93345;transcript_93706;transcript_…	map00780	http://www.genome.jp/dbget-bin/show_pathway?map00780/K02372%09green/K00059%09green/K00652%09green/K01012%09green/K01942%09green/K00208%09green/K09458%09green
map00785	Metabolism	Metabolism of cofactors and vitamins	Lipoic acid metabolism	11	transcript_70341;transcript_73989;transcript_74851;transcript_61535;transcript_49962;transcript_50723;transcript_27117;transcript_28904;transcript_34122;transcript_38100;transcript_38742	map00785	http://www.genome.jp/dbget-bin/show_pathway?map00785/K03644%09green/K23735%09green/K03801%09green
map00790	Metabolism	Metabolism of cofactors and vitamins	Folate biosynthesis	61	transcript_1540;transcript_6684;transcript_18578;transcript_68973;transcript_70746;transcript_71650;transcript_74040;transcript_75516;transcript_77843;transcript_80494;transcript_82975;transcript_84995;transcript_85213;transcript_86054;transcript_88826;transcript_90318;transcript_91258;transcript_56147;transcript_58100;transcript_58440;transcript_59365;transcript_64953;transcript_65622;transcript…	map00790	http://www.genome.jp/dbget-bin/show_pathway?map00790/K03635%09green/K18482%09green/K03637%09green/K14652%09green/cann%09green/K01307%09green/K13998%09green/K00079%09green/K03639%09green/oeu%09green/K01724%09green/K01633%09green/K13950%09green/K15376%09green/K20457%09green/K01930%09green/K01495%09green/K15631%09green
map00670	Metabolism	Metabolism of cofactors and vitamins	One carbon pool by folate	109	transcript_575;transcript_576;transcript_585;transcript_1272;transcript_2161;transcript_8613;transcript_12097;transcript_12175;transcript_12327;transcript_12702;transcript_12763;transcript_12902;transcript_12999;transcript_17577;transcript_17889;transcript_18103;transcript_18693;transcript_18753;transcript_71504;transcript_72217;transcript_72228;transcript_74416;transcript_75001;transcript_75050;…	map00670	http://www.genome.jp/dbget-bin/show_pathway?map00670/btab%09green/K13998%09green/cann%09green/K00297%09green/K00601%09green/K00600%09green/K00602%09green/K00605%09green/K10393%09green/K01934%09green/K01938%09green/K01433%09green/K00288%09green
map00860	Metabolism	Metabolism of cofactors and vitamins	Porphyrin and chlorophyll metabolism	200	transcript_299;transcript_838;transcript_2185;transcript_3447;transcript_4809;transcript_5496;transcript_8141;transcript_9128;transcript_9269;transcript_9807;transcript_10516;transcript_11726;transcript_12386;transcript_13107;transcript_18044;transcript_18371;transcript_18400;transcript_18552;transcript_18762;transcript_18787;transcript_97448;transcript_98640;transcript_99120;transcript_104364;tr…	map00860	http://www.genome.jp/dbget-bin/show_pathway?map00860/K02257%09green/K01749%09green/K19073%09green/K02259%09green/K01772%09green/K01845%09green/K02492%09green/K03403%09green/K18010%09green/K19054%09green/K13545%09green/K00228%09green/K21480%09green/K01698%09green/K08099%09green/cit%09green/K13600%09green/K02303%09green/K13606%09green/nta%09green/K01719%09green/K01599%09green/cic%09green/K10960%09g…
map00130	Metabolism	Metabolism of cofactors and vitamins	Ubiquinone and other terpenoid-quinone biosynthesis	141	transcript_919;transcript_1014;transcript_1050;transcript_1425;transcript_1657;transcript_2913;transcript_3222;transcript_3910;transcript_4270;transcript_7331;transcript_7663;transcript_8118;transcript_10763;transcript_12168;transcript_12293;transcript_12338;transcript_12891;transcript_17524;transcript_68317;transcript_69637;transcript_69888;transcript_70568;transcript_71416;transcript_71459;tran…	map00130	http://www.genome.jp/dbget-bin/show_pathway?map00130/K01661%09green/K15919%09green/cann%09green/nsy%09green/K00815%09green/K00487%09green/K18606%09green/K14760%09green/K17872%09green/K06126%09green/K06127%09green/K23095%09green/K23094%09green/K19222%09green/nto%09green/K02552%09green/nau%09green/K03809%09green/K12501%09green/oeu%09green/K12502%09green/K00591%09green/K01904%09green/qsu%09green/nta…
map00900	Metabolism	Metabolism of terpenoids and polyketides	Terpenoid backbone biosynthesis	238	transcript_1044;transcript_1787;transcript_2164;transcript_2986;transcript_3024;transcript_3108;transcript_3792;transcript_4732;transcript_5295;transcript_6128;transcript_9088;transcript_9556;transcript_12412;transcript_12471;transcript_12511;transcript_12917;transcript_12942;transcript_13136;transcript_13314;transcript_18302;transcript_18400;transcript_99155;transcript_99355;transcript_99661;tra…	map00900	http://www.genome.jp/dbget-bin/show_pathway?map00900/K01662%09green/K08658%09green/K00938%09green/K01641%09green/K00919%09green/K00626%09green/K15889%09green/K05954%09green/K05955%09green/K05356%09green/K14066%09green/K00787%09green/K11778%09green/K00099%09green/oeu%09green/K00869%09green/K06013%09green/K15891%09green/K13789%09green/K01770%09green/K15892%09green/K10960%09green/K05906%09green/K015…
map00902	Metabolism	Metabolism of terpenoids and polyketides	Monoterpenoid biosynthesis	39	transcript_3834;transcript_4016;transcript_17757;transcript_69613;transcript_70095;transcript_72857;transcript_75807;transcript_76174;transcript_76627;transcript_79947;transcript_82296;transcript_55297;transcript_56607;transcript_57588;transcript_57830;transcript_58005;transcript_58783;transcript_59360;transcript_61024;transcript_61512;transcript_66633;transcript_42880;transcript_44059;transcript…	map00902	http://www.genome.jp/dbget-bin/show_pathway?map00902/pavi%09green/K15095%09green/K00083%09green/K20556%09green/oeu%09green/K23232%09green/cit%09green/pper%09green/sind%09green/K23810%09green/K07385%09green/K18108%09green
map00909	Metabolism	Metabolism of terpenoids and polyketides	Sesquiterpenoid and triterpenoid biosynthesis	37	transcript_6986;transcript_12258;transcript_12337;transcript_12687;transcript_69152;transcript_75925;transcript_82604;transcript_87836;transcript_93500;transcript_55880;transcript_58263;transcript_60131;transcript_64027;transcript_65674;transcript_43069;transcript_43922;transcript_50847;transcript_50947;transcript_52623;transcript_52999;transcript_54936;transcript_23527;transcript_23786;transcrip…	map00909	http://www.genome.jp/dbget-bin/show_pathway?map00909/pavi%09green/K15891%09green/K15472%09green/K15813%09green/K15803%09green/oeu%09green/ccav%09green/K14183%09green/K00511%09green/K14182%09green/sind%09green/K18117%09green/K00801%09green
map00904	Metabolism	Metabolism of terpenoids and polyketides	Diterpenoid biosynthesis	32	transcript_7631;transcript_71266;transcript_71983;transcript_74205;transcript_75413;transcript_77275;transcript_84754;transcript_87136;transcript_92348;transcript_55503;transcript_56316;transcript_56698;transcript_58338;transcript_59618;transcript_60320;transcript_62569;transcript_43519;transcript_44106;transcript_45365;transcript_48766;transcript_50912;transcript_21535;transcript_22314;transcrip…	map00904	http://www.genome.jp/dbget-bin/show_pathway?map00904/K04124%09green/K04125%09green/K04120%09green/K04121%09green/oeu%09green/K04123%09green/pop%09green/K04122%09green/nta%09green/pxb%09green/sind%09green/K05282%09green
map00906	Metabolism	Metabolism of terpenoids and polyketides	Carotenoid biosynthesis	98	transcript_1684;transcript_2437;transcript_7103;transcript_8296;transcript_8720;transcript_12367;transcript_97936;transcript_68512;transcript_69445;transcript_70101;transcript_70785;transcript_71106;transcript_71678;transcript_74180;transcript_74299;transcript_77863;transcript_78757;transcript_80949;transcript_81945;transcript_82732;transcript_83548;transcript_87647;transcript_88416;transcript_89…	map00906	http://www.genome.jp/dbget-bin/show_pathway?map00906/K14593%09green/K09840%09green/K15747%09green/K09842%09green/K09843%09green/K02291%09green/K02293%09green/K06444%09green/oeu%09green/K00514%09green/K09835%09green/K09837%09green/K15746%09green/K06443%09green/K09839%09green/K09838%09green/K09841%09green
map00905	Metabolism	Metabolism of terpenoids and polyketides	Brassinosteroid biosynthesis	67	transcript_1985;transcript_6006;transcript_7060;transcript_10106;transcript_12820;transcript_17551;transcript_17823;transcript_17947;transcript_70553;transcript_73210;transcript_75963;transcript_77359;transcript_78557;transcript_80042;transcript_85948;transcript_88266;transcript_88673;transcript_97106;transcript_55795;transcript_56565;transcript_59072;transcript_59506;transcript_59699;transcript_…	map00905	http://www.genome.jp/dbget-bin/show_pathway?map00905/K20623%09green/K09588%09green/K12639%09green/K15639%09green/K12637%09green/K09587%09green/K09590%09green/K09591%09green
map00908	Metabolism	Metabolism of terpenoids and polyketides	Zeatin biosynthesis	35	transcript_6901;transcript_12236;transcript_68242;transcript_69073;transcript_74839;transcript_76671;transcript_77232;transcript_78947;transcript_87078;transcript_88564;transcript_56433;transcript_56463;transcript_57196;transcript_57609;transcript_67737;transcript_42636;transcript_43668;transcript_44086;transcript_45567;transcript_45645;transcript_49475;transcript_51759;transcript_53206;transcrip…	map00908	http://www.genome.jp/dbget-bin/show_pathway?map00908/K00279%09green/ccav%09green/K10717%09green/K23452%09green/qsu%09green/nau%09green/K13495%09green/K13496%09green/psom%09green/K10760%09green/K00791%09green
map00903	Metabolism	Metabolism of terpenoids and polyketides	Limonene and pinene degradation	28	transcript_10741;transcript_12339;transcript_12572;transcript_12650;transcript_12670;transcript_12740;transcript_68996;transcript_70694;transcript_73903;transcript_79970;transcript_86307;transcript_90221;transcript_55564;transcript_55722;transcript_58911;transcript_61461;transcript_63136;transcript_66221;transcript_50799;transcript_55155;transcript_27437;transcript_29991;transcript_30616;transcri…	map00903	http://www.genome.jp/dbget-bin/show_pathway?map00903/K00128%09green/K01692%09green/K03676%09green
map00523	Metabolism	Metabolism of terpenoids and polyketides	Polyketide sugar unit biosynthesis	9	transcript_3712;transcript_68843;transcript_58865;transcript_65542;transcript_49350;transcript_49469;transcript_54719;transcript_25611;transcript_41241	map00523	http://www.genome.jp/dbget-bin/show_pathway?map00523/K12451%09green
map00940	Metabolism	Biosynthesis of other secondary metabolites	Phenylpropanoid biosynthesis	386	transcript_203;transcript_232;transcript_273;transcript_448;transcript_651;transcript_698;transcript_919;transcript_1014;transcript_1050;transcript_1080;transcript_1107;transcript_1611;transcript_2785;transcript_2857;transcript_3028;transcript_3124;transcript_3640;transcript_4270;transcript_4932;transcript_5480;transcript_6011;transcript_6563;transcript_6884;transcript_7663;transcript_7850;transc…	map00940	http://www.genome.jp/dbget-bin/show_pathway?map00940/nto%09green/cann%09green/K00083%09green/K12355%09green/K23232%09green/pxb%09green/K00588%09green/K18368%09green/K00487%09green/K13065%09green/K13066%09green/K01188%09green/K05350%09green/nau%09green/K14288%09green/pper%09green/pavi%09green/K10775%09green/oeu%09green/ccaj%09green/K01904%09green/qsu%09green/K09754%09green/K09755%09green/sind%09gr…
map00945	Metabolism	Biosynthesis of other secondary metabolites	Stilbenoid, diarylheptanoid and gingerol biosynthesis	111	transcript_651;transcript_1611;transcript_3124;transcript_4270;transcript_4932;transcript_7997;transcript_9642;transcript_11636;transcript_12228;transcript_12891;transcript_17524;transcript_18107;transcript_18294;transcript_18372;transcript_18374;transcript_98235;transcript_99824;transcript_68378;transcript_71697;transcript_72760;transcript_72840;transcript_76771;transcript_77814;transcript_78796…	map00945	http://www.genome.jp/dbget-bin/show_pathway?map00945/K16040%09green/K13065%09green/K15400%09green/K09754%09green/K00588%09green/K00487%09green
map00941	Metabolism	Biosynthesis of other secondary metabolites	Flavonoid biosynthesis	132	transcript_651;transcript_1611;transcript_3124;transcript_4270;transcript_4932;transcript_9642;transcript_11636;transcript_12228;transcript_12891;transcript_13080;transcript_13119;transcript_17524;transcript_18107;transcript_18294;transcript_18372;transcript_18374;transcript_18610;transcript_98235;transcript_99824;transcript_68378;transcript_69737;transcript_71697;transcript_72760;transcript_7284…	map00941	http://www.genome.jp/dbget-bin/show_pathway?map00941/K13065%09green/K22845%09green/K23179%09green/K01859%09green/K15400%09green/K00660%09green/K09754%09green/K00588%09green/K05278%09green/K00487%09green/K05280%09green
map00944	Metabolism	Biosynthesis of other secondary metabolites	Flavone and flavonol biosynthesis	7	transcript_13119;transcript_78662;transcript_88501;transcript_55366;transcript_57046;transcript_53356;transcript_34567	map00944	http://www.genome.jp/dbget-bin/show_pathway?map00944/K22794%09green/K05280%09green
map00942	Metabolism	Biosynthesis of other secondary metabolites	Anthocyanin biosynthesis	6	transcript_71108;transcript_72529;transcript_66738;transcript_50951;transcript_36887;transcript_38471	map00942	http://www.genome.jp/dbget-bin/show_pathway?map00942/K17193%09green/K21383%09green
map00943	Metabolism	Biosynthesis of other secondary metabolites	Isoflavonoid biosynthesis	18	transcript_13080;transcript_18376;transcript_18610;transcript_83024;transcript_85313;transcript_55416;transcript_57362;transcript_57593;transcript_60421;transcript_65084;transcript_44094;transcript_46489;transcript_50373;transcript_53789;transcript_33092;transcript_35335;transcript_38466;transcript_39378	map00943	http://www.genome.jp/dbget-bin/show_pathway?map00943/K23179%09green/sind%09green/K13260%09green/pxb%09green
map00901	Metabolism	Biosynthesis of other secondary metabolites	Indole alkaloid biosynthesis	7	transcript_17686;transcript_88658;transcript_50582;transcript_29905;transcript_31286;transcript_33486;transcript_34652	map00901	http://www.genome.jp/dbget-bin/show_pathway?map00901/K01593%09green
map00950	Metabolism	Biosynthesis of other secondary metabolites	Isoquinoline alkaloid biosynthesis	80	transcript_74;transcript_282;transcript_2592;transcript_2911;transcript_4003;transcript_5057;transcript_6572;transcript_12140;transcript_12968;transcript_17686;transcript_18245;transcript_18595;transcript_70568;transcript_80097;transcript_82198;transcript_82919;transcript_83621;transcript_87350;transcript_88658;transcript_90083;transcript_92848;transcript_94421;transcript_57288;transcript_57912;t…	map00950	http://www.genome.jp/dbget-bin/show_pathway?map00950/cic%09green/K00276%09green/K14455%09green/K14454%09green/K15849%09green/K00811%09green/K00815%09green/cit%09green/K00422%09green/K01593%09green
map00960	Metabolism	Biosynthesis of other secondary metabolites	Tropane, piperidine and pyridine alkaloid biosynthesis	74	transcript_74;transcript_282;transcript_2592;transcript_2911;transcript_3910;transcript_4003;transcript_5057;transcript_6572;transcript_6728;transcript_12968;transcript_18245;transcript_18595;transcript_97722;transcript_100271;transcript_70568;transcript_80097;transcript_82198;transcript_82821;transcript_82919;transcript_83621;transcript_87350;transcript_90083;transcript_91736;transcript_92848;tr…	map00960	http://www.genome.jp/dbget-bin/show_pathway?map00960/cic%09green/K00276%09green/K14455%09green/K14454%09green/K15919%09green/cit%09green/K15849%09green/oeu%09green/K00811%09green/K00815%09green/K08081%09green/K00817%09green/K18606%09green
map00232	Metabolism	Biosynthesis of other secondary metabolites	Caffeine metabolism	9	transcript_10447;transcript_69039;transcript_79780;transcript_56257;transcript_59980;transcript_54097;transcript_20971;transcript_30226;transcript_32715	map00232	http://www.genome.jp/dbget-bin/show_pathway?map00232/K00106%09green/K00365%09green
map00965	Metabolism	Biosynthesis of other secondary metabolites	Betalain biosynthesis	14	transcript_17686;transcript_85607;transcript_88658;transcript_95602;transcript_56541;transcript_60579;transcript_60918;transcript_46405;transcript_50582;transcript_29905;transcript_31286;transcript_33486;transcript_34652;transcript_36841	map00965	http://www.genome.jp/dbget-bin/show_pathway?map00965/K15777%09green/K01593%09green
map00966	Metabolism	Biosynthesis of other secondary metabolites	Glucosinolate biosynthesis	16	transcript_9869;transcript_12927;transcript_74553;transcript_87871;transcript_88565;transcript_90369;transcript_90735;transcript_91436;transcript_63396;transcript_48063;transcript_49157;transcript_51698;transcript_36168;transcript_38501;transcript_41067;transcript_42058	map00966	http://www.genome.jp/dbget-bin/show_pathway?map00966/nta%09green/K00826%09green/K01703%09green
map00261	Metabolism	Biosynthesis of other secondary metabolites	Monobactam biosynthesis	49	transcript_3378;transcript_3682;transcript_9260;transcript_13125;transcript_17645;transcript_17646;transcript_17902;transcript_18183;transcript_18649;transcript_68231;transcript_83189;transcript_87547;transcript_88290;transcript_88751;transcript_58955;transcript_58956;transcript_61644;transcript_63684;transcript_64264;transcript_45816;transcript_47432;transcript_48490;transcript_49843;transcript_…	map00261	http://www.genome.jp/dbget-bin/show_pathway?map00261/K00133%09green/K13811%09green/K00215%09green/K01714%09green/K12524%09green/K00928%09green
map00254	Metabolism	Biosynthesis of other secondary metabolites	Aflatoxin biosynthesis	3	transcript_46656;transcript_52344;transcript_40211	map00254	http://www.genome.jp/dbget-bin/show_pathway?map00254/sind%09green/K11262%09green/oeu%09green/nau%09green
map00998	Metabolism	Biosynthesis of other secondary metabolites	Biosynthesis of various secondary metabolites - part 2	2	transcript_69833;transcript_67625	map00998	http://www.genome.jp/dbget-bin/show_pathway?map00998/cann%09green/K21568%09green
map03020	Genetic Information Processing	Transcription	RNA polymerase	110	transcript_1084;transcript_3168;transcript_3309;transcript_3383;transcript_3869;transcript_4205;transcript_4631;transcript_4697;transcript_5129;transcript_5556;transcript_6300;transcript_7638;transcript_7870;transcript_8343;transcript_11052;transcript_12234;transcript_68863;transcript_69811;transcript_69893;transcript_70668;transcript_70883;transcript_71247;transcript_72173;transcript_72378;trans…	map03020	http://www.genome.jp/dbget-bin/show_pathway?map03020/K03026%09green/cann%09green/K03006%09green/nsy%09green/K03022%09green/K03023%09green/bvg%09green/K03025%09green/K03000%09green/K03027%09green/K03046%09green/K03008%09green/K03009%09green/nto%09green/K03021%09green/nau%09green/K02999%09green/K14721%09green/K03005%09green/oeu%09green/K03015%09green/K03014%09green/K03016%09green/K03011%09green/K03…
map03022	Genetic Information Processing	Transcription	Basal transcription factors	142	transcript_639;transcript_1328;transcript_3098;transcript_3938;transcript_5593;transcript_9340;transcript_10471;transcript_17728;transcript_97999;transcript_68461;transcript_68526;transcript_68570;transcript_68646;transcript_69407;transcript_69814;transcript_69875;transcript_70737;transcript_72318;transcript_72423;transcript_74702;transcript_76148;transcript_76979;transcript_77947;transcript_7914…	map03022	http://www.genome.jp/dbget-bin/show_pathway?map03022/K03143%09green/K03142%09green/K03141%09green/K03144%09green/K03125%09green/K03124%09green/K03126%09green/K03120%09green/K03123%09green/K03122%09green/pxb%09green/K03129%09green/K03128%09green/K14651%09green/K06634%09green/K03136%09green/K03137%09green/K03134%09green/K03135%09green/K03132%09green/K03133%09green/K03130%09green/K03131%09green/K022…
map03040	Genetic Information Processing	Transcription	Spliceosome	1040	transcript_83;transcript_123;transcript_159;transcript_163;transcript_204;transcript_331;transcript_394;transcript_449;transcript_455;transcript_456;transcript_463;transcript_565;transcript_583;transcript_591;transcript_593;transcript_661;transcript_702;transcript_761;transcript_770;transcript_782;transcript_811;transcript_865;transcript_881;transcript_1008;transcript_1015;transcript_1337;transcr…	map03040	http://www.genome.jp/dbget-bin/show_pathway?map03040/K14314%09green/K10599%09green/bvg%09green/K12733%09green/K12880%09green/K12881%09green/K12882%09green/K12883%09green/K12885%09green/K12854%09green/cpap%09green/K12817%09green/K12816%09green/K12815%09green/K09567%09green/K12812%09green/K12811%09green/K07088%09green/K12819%09green/K12818%09green/K03938%09green/K12897%09green/K12896%09green/K12893…
map03010	Genetic Information Processing	Translation	Ribosome	1386	transcript_1135;transcript_1163;transcript_1191;transcript_1255;transcript_1256;transcript_1290;transcript_1304;transcript_1352;transcript_1363;transcript_1385;transcript_1399;transcript_1404;transcript_1440;transcript_1502;transcript_1530;transcript_1565;transcript_1569;transcript_1578;transcript_1592;transcript_1599;transcript_1617;transcript_1621;transcript_1629;transcript_1637;transcript_1653…	map03010	http://www.genome.jp/dbget-bin/show_pathway?map03010/K01601%09green/K02957%09green/K02955%09green/K02954%09green/K02889%09green/K02952%09green/K02951%09green/K02950%09green/K02885%09green/K02884%09green/K02887%09green/K02881%09green/K02880%09green/K02883%09green/K02882%09green/K02922%09green/K02923%09green/K02920%09green/K02921%09green/K02926%09green/K02927%09green/K02924%09green/K02925%09green/K…
map00970	Genetic Information Processing	Translation	Aminoacyl-tRNA biosynthesis	257	transcript_51;transcript_150;transcript_299;transcript_459;transcript_468;transcript_566;transcript_754;transcript_757;transcript_1081;transcript_1170;transcript_6065;transcript_6676;transcript_6957;transcript_7602;transcript_7629;transcript_7969;transcript_8402;transcript_8419;transcript_8537;transcript_8705;transcript_9177;transcript_10131;transcript_12079;transcript_12083;transcript_12128;tran…	map00970	http://www.genome.jp/dbget-bin/show_pathway?map00970/K01870%09green/K01873%09green/K01872%09green/K01875%09green/K01874%09green/K01876%09green/K14164%09green/K05841%09green/K02434%09green/K02435%09green/K04567%09green/K02433%09green/K01893%09green/K01892%09green/K01890%09green/oeu%09green/ccaj%09green/K01866%09green/K01867%09green/nta%09green/K01868%09green/K01869%09green/K22503%09green/K01880%09…
map03013	Genetic Information Processing	Translation	RNA transport	837	transcript_43;transcript_192;transcript_205;transcript_238;transcript_290;transcript_298;transcript_359;transcript_379;transcript_520;transcript_532;transcript_618;transcript_782;transcript_976;transcript_1334;transcript_1337;transcript_1656;transcript_1742;transcript_1855;transcript_2056;transcript_2109;transcript_2178;transcript_2262;transcript_2286;transcript_2356;transcript_2537;transcript_26…	map03013	http://www.genome.jp/dbget-bin/show_pathway?map03013/K00430%09green/nto%09green/K14301%09green/K14300%09green/K14303%09green/K14305%09green/K14304%09green/K14307%09green/K14306%09green/K14309%09green/K14308%09green/K12880%09green/K12881%09green/K12882%09green/K12883%09green/K13126%09green/cpap%09green/K03239%09green/K14288%09green/K12812%09green/K03231%09green/K03237%09green/K03236%09green/K13137…
map03015	Genetic Information Processing	Translation	mRNA surveillance pathway	561	transcript_192;transcript_235;transcript_238;transcript_290;transcript_359;transcript_390;transcript_482;transcript_616;transcript_630;transcript_650;transcript_685;transcript_721;transcript_722;transcript_751;transcript_764;transcript_782;transcript_1018;transcript_1079;transcript_1337;transcript_2032;transcript_2226;transcript_2286;transcript_2537;transcript_2725;transcript_3257;transcript_3653…	map03015	http://www.genome.jp/dbget-bin/show_pathway?map03015/K14407%09green/qsu%09green/rsz%09green/pop%09green/K06965%09green/K03267%09green/K14328%09green/K18624%09green/K15544%09green/K14326%09green/K14325%09green/K14324%09green/K04354%09green/K14402%09green/K14327%09green/K11584%09green/nto%09green/K12881%09green/K12882%09green/K12883%09green/K00565%09green/nau%09green/K13025%09green/bna%09green/K115…
map03008	Genetic Information Processing	Translation	Ribosome biogenesis in eukaryotes	276	transcript_184;transcript_330;transcript_490;transcript_508;transcript_1040;transcript_1064;transcript_2195;transcript_2974;transcript_3354;transcript_3844;transcript_4082;transcript_6080;transcript_6407;transcript_7337;transcript_7808;transcript_9935;transcript_12047;transcript_12106;transcript_12211;transcript_12226;transcript_12269;transcript_12270;transcript_12550;transcript_12624;transcript_…	map03008	http://www.genome.jp/dbget-bin/show_pathway?map03008/K11108%09green/K11131%09green/K03264%09green/K11129%09green/K14545%09green/pxb%09green/K12845%09green/nnu%09green/K12619%09green/K11128%09green/K14572%09green/K14573%09green/K14570%09green/K07562%09green/K14558%09green/K14559%09green/K14574%09green/K14554%09green/K14555%09green/K14556%09green/K14557%09green/K14550%09green/K14552%09green/K14553%…
map03060	Genetic Information Processing	Folding, sorting and degradation	Protein export	185	transcript_260;transcript_286;transcript_318;transcript_509;transcript_665;transcript_699;transcript_3525;transcript_4033;transcript_5114;transcript_5607;transcript_6845;transcript_7685;transcript_7800;transcript_7828;transcript_9083;transcript_9520;transcript_10510;transcript_12290;transcript_18194;transcript_18489;transcript_97374;transcript_97459;transcript_98136;transcript_68234;transcript_68…	map03060	http://www.genome.jp/dbget-bin/show_pathway?map03060/pop%09green/K09647%09green/K03108%09green/K03107%09green/K03106%09green/K09648%09green/K03104%09green/K03105%09green/K03100%09green/K09481%09green/K12947%09green/K12946%09green/K13431%09green/K03070%09green/K03217%09green/K03110%09green/K03116%09green/K03118%09green/K12948%09green/K09490%09green/K09540%09green/K13280%09green/K07342%09green/K122…
map04141	Genetic Information Processing	Folding, sorting and degradation	Protein processing in endoplasmic reticulum	934	transcript_107;transcript_154;transcript_167;transcript_204;transcript_236;transcript_247;transcript_260;transcript_270;transcript_286;transcript_394;transcript_442;transcript_449;transcript_455;transcript_456;transcript_457;transcript_593;transcript_683;transcript_788;transcript_811;transcript_902;transcript_1033;transcript_1133;transcript_1217;transcript_1268;transcript_1524;transcript_1579;tra…	map04141	http://www.genome.jp/dbget-bin/show_pathway?map04141/K10597%09green/K06689%09green/K10661%09green/K10666%09green/K08852%09green/K02159%09green/K09486%09green/K09487%09green/K09481%09green/K14009%09green/cpap%09green/K09562%09green/K09561%09green/K11718%09green/K01456%09green/K03237%09green/K09490%09green/K07765%09green/K04079%09green/K10578%09green/K10575%09green/K12667%09green/K13719%09green/K09…
map04130	Genetic Information Processing	Folding, sorting and degradation	SNARE interactions in vesicular transport	144	transcript_1201;transcript_3294;transcript_3544;transcript_3877;transcript_4978;transcript_5694;transcript_6364;transcript_7009;transcript_7171;transcript_7793;transcript_8130;transcript_9217;transcript_9362;transcript_9661;transcript_10283;transcript_11407;transcript_68631;transcript_69667;transcript_69847;transcript_70794;transcript_71378;transcript_71786;transcript_73039;transcript_73898;trans…	map04130	http://www.genome.jp/dbget-bin/show_pathway?map04130/K08495%09green/K08496%09green/K08488%09green/K08490%09green/K08504%09green/K08492%09green/K08493%09green/K08489%09green/K08516%09green/K08498%09green/K08503%09green/K08497%09green/K08515%09green/K08507%09green/K08517%09green/K08505%09green/K08506%09green/K08509%09green/K08486%09green
map04120	Genetic Information Processing	Folding, sorting and degradation	Ubiquitin mediated proteolysis	546	transcript_80;transcript_234;transcript_434;transcript_442;transcript_1003;transcript_1004;transcript_1334;transcript_1477;transcript_1524;transcript_1561;transcript_1574;transcript_1648;transcript_1688;transcript_1742;transcript_1758;transcript_1779;transcript_1790;transcript_1855;transcript_1956;transcript_1961;transcript_2021;transcript_2025;transcript_2071;transcript_2254;transcript_2261;tran…	map04120	http://www.genome.jp/dbget-bin/show_pathway?map04120/K10609%09green/K04506%09green/K10588%09green/K10597%09green/K10590%09green/K10591%09green/K06689%09green/K10579%09green/cann%09green/K10577%09green/K10575%09green/K10598%09green/K10573%09green/K10570%09green/K10571%09green/K10601%09green/nta%09green/K10606%09green/K12456%09green/nnu%09green/nau%09green/K15688%09green/pvu%09green/K03868%09green/…
map04122	Genetic Information Processing	Folding, sorting and degradation	Sulfur relay system	34	transcript_1540;transcript_10872;transcript_72695;transcript_73522;transcript_77422;transcript_77942;transcript_79761;transcript_81812;transcript_82219;transcript_86246;transcript_86422;transcript_90054;transcript_90158;transcript_57463;transcript_62110;transcript_66677;transcript_66798;transcript_48055;transcript_49763;transcript_50549;transcript_53410;transcript_20141;transcript_24306;transcrip…	map04122	http://www.genome.jp/dbget-bin/show_pathway?map04122/K03635%09green/K04487%09green/K03637%09green/K03639%09green/K01011%09green/K21232%09green/K12161%09green/K14169%09green/K14168%09green/K11996%09green
map03050	Genetic Information Processing	Folding, sorting and degradation	Proteasome	257	transcript_694;transcript_1221;transcript_2133;transcript_3068;transcript_3071;transcript_3110;transcript_3454;transcript_3546;transcript_3553;transcript_3717;transcript_3848;transcript_3952;transcript_4482;transcript_4949;transcript_5819;transcript_6905;transcript_7067;transcript_7122;transcript_8156;transcript_8729;transcript_9110;transcript_9238;transcript_9791;transcript_9933;transcript_10271…	map03050	http://www.genome.jp/dbget-bin/show_pathway?map03050/K03064%09green/K03065%09green/K03066%09green/K03061%09green/K03062%09green/K10881%09green/K03028%09green/K03029%09green/K03063%09green/K02728%09green/K02729%09green/K02725%09green/K02726%09green/K02727%09green/K06691%09green/K06699%09green/K03039%09green/K03038%09green/K03037%09green/K03036%09green/K03035%09green/K03033%09green/K03032%09green/K…
map03018	Genetic Information Processing	Folding, sorting and degradation	RNA degradation	403	transcript_192;transcript_238;transcript_290;transcript_398;transcript_535;transcript_574;transcript_678;transcript_687;transcript_701;transcript_739;transcript_822;transcript_860;transcript_1683;transcript_2286;transcript_2326;transcript_2863;transcript_3122;transcript_3233;transcript_3404;transcript_3613;transcript_3653;transcript_3703;transcript_3753;transcript_4000;transcript_4168;transcript_…	map03018	http://www.genome.jp/dbget-bin/show_pathway?map03018/K03679%09green/K03678%09green/K00850%09green/nto%09green/K01689%09green/K12625%09green/oor%09green/K12614%09green/K12617%09green/K12616%09green/K12592%09green/K12593%09green/K12613%09green/K12591%09green/pxb%09green/nnu%09green/K12586%09green/K12619%09green/K12598%09green/K12599%09green/K04043%09green/K12590%09green/K20553%09green/ccaj%09green/…
map03030	Genetic Information Processing	Replication and repair	DNA replication	106	transcript_1214;transcript_1294;transcript_2564;transcript_4316;transcript_4580;transcript_5339;transcript_6018;transcript_8292;transcript_97778;transcript_99426;transcript_68326;transcript_68353;transcript_71805;transcript_71903;transcript_71926;transcript_72613;transcript_72788;transcript_73022;transcript_73589;transcript_74405;transcript_74690;transcript_75219;transcript_75345;transcript_75763…	map03030	http://www.genome.jp/dbget-bin/show_pathway?map03030/K10745%09green/K10744%09green/K10747%09green/K10743%09green/cann%09green/nsy%09green/K02212%09green/K02335%09green/K07466%09green/K10739%09green/K02541%09green/K10756%09green/K10754%09green/K10755%09green/cpap%09green/oeu%09green/ccav%09green/K02320%09green/K03111%09green/K02324%09green/K02325%09green/nto%09green/K02327%09green/K02328%09green/s…
map03410	Genetic Information Processing	Replication and repair	Base excision repair	98	transcript_1173;transcript_1176;transcript_1199;transcript_1593;transcript_2220;transcript_3250;transcript_3458;transcript_4054;transcript_4580;transcript_6018;transcript_7251;transcript_12826;transcript_98218;transcript_99426;transcript_68158;transcript_68247;transcript_68326;transcript_68493;transcript_69988;transcript_70482;transcript_71822;transcript_71903;transcript_71926;transcript_72327;tr…	map03410	http://www.genome.jp/dbget-bin/show_pathway?map03410/K10563%09green/K10747%09green/K01246%09green/K01247%09green/K04802%09green/K02335%09green/K02330%09green/K10798%09green/pper%09green/K03648%09green/K03512%09green/K10772%09green/K10773%09green/K01142%09green/K03660%09green/K03575%09green/K11296%09green/K02324%09green/oeu%09green/qsu%09green/K02327%09green/K02328%09green/sind%09green/K04799%09gr…
map03420	Genetic Information Processing	Replication and repair	Nucleotide excision repair	191	transcript_1003;transcript_1214;transcript_1294;transcript_2021;transcript_2564;transcript_3815;transcript_3938;transcript_4216;transcript_4316;transcript_4580;transcript_5339;transcript_5593;transcript_5813;transcript_5964;transcript_6018;transcript_6495;transcript_8292;transcript_8590;transcript_8962;transcript_9340;transcript_10471;transcript_12172;transcript_97778;transcript_100241;transcript…	map03420	http://www.genome.jp/dbget-bin/show_pathway?map03420/K03143%09green/K03142%09green/K03141%09green/K03144%09green/cann%09green/K10609%09green/K10747%09green/K10570%09green/nsy%09green/K02335%09green/K03868%09green/K07466%09green/K10839%09green/K10838%09green/K06634%09green/K10739%09green/K10756%09green/K10754%09green/K10755%09green/cpap%09green/oeu%09green/K10610%09green/K02324%09green/K02325%09gr…
map03430	Genetic Information Processing	Replication and repair	Mismatch repair	84	transcript_1214;transcript_1294;transcript_2564;transcript_4316;transcript_4580;transcript_5339;transcript_8292;transcript_97778;transcript_68326;transcript_71805;transcript_71926;transcript_72613;transcript_72843;transcript_73022;transcript_73589;transcript_74690;transcript_75197;transcript_75219;transcript_75345;transcript_76299;transcript_76913;transcript_78703;transcript_79732;transcript_7988…	map03430	http://www.genome.jp/dbget-bin/show_pathway?map03430/K10747%09green/cann%09green/K01466%09green/nsy%09green/K08735%09green/K08734%09green/K10858%09green/K07466%09green/K08739%09green/K10739%09green/K10756%09green/K10754%09green/K10755%09green/cpap%09green/oeu%09green/ccav%09green/K03111%09green/nto%09green/K02327%09green/K02328%09green/sind%09green/K07456%09green/nta%09green/pda%09green/K04802%09…
map03440	Genetic Information Processing	Replication and repair	Homologous recombination	139	transcript_1214;transcript_1294;transcript_2564;transcript_3129;transcript_4316;transcript_4580;transcript_5339;transcript_7122;transcript_8292;transcript_9238;transcript_9630;transcript_16820;transcript_18801;transcript_99146;transcript_68326;transcript_68528;transcript_71336;transcript_71684;transcript_71926;transcript_72263;transcript_72603;transcript_72613;transcript_73969;transcript_74690;tr…	map03440	http://www.genome.jp/dbget-bin/show_pathway?map03440/K10882%09green/qsu%09green/K10881%09green/cann%09green/pavi%09green/nsy%09green/K02335%09green/K03165%09green/K08991%09green/K04482%09green/K07466%09green/K08775%09green/K10875%09green/pper%09green/K10739%09green/cpep%09green/K04728%09green/K12173%09green/cpap%09green/K03553%09green/oeu%09green/ccav%09green/K03111%09green/nto%09green/K02327%09g…
map03450	Genetic Information Processing	Replication and repair	Non-homologous end-joining	20	transcript_99426;transcript_68493;transcript_72235;transcript_73969;transcript_74405;transcript_76129;transcript_83249;transcript_83681;transcript_59432;transcript_61007;transcript_43035;transcript_46504;transcript_20965;transcript_24138;transcript_24480;transcript_26017;transcript_26167;transcript_30869;transcript_35809;transcript_37462	map03450	http://www.genome.jp/dbget-bin/show_pathway?map03450/cmo%09green/K04799%09green/K10777%09green/K10865%09green/K10866%09green/K10884%09green/oeu%09green/sind%09green/cpap%09green/K03512%09green
map02010	Environmental Information Processing	Membrane transport	ABC transporters	109	transcript_41;transcript_91;transcript_102;transcript_8677;transcript_9095;transcript_12981;transcript_13058;transcript_18201;transcript_98252;transcript_98292;transcript_100773;transcript_68245;transcript_69451;transcript_69831;transcript_70415;transcript_70524;transcript_73047;transcript_73448;transcript_73611;transcript_77116;transcript_77426;transcript_78237;transcript_78329;transcript_80690;…	map02010	http://www.genome.jp/dbget-bin/show_pathway?map02010/K05665%09green/nsy%09green/pxb%09green/K05677%09green/K05674%09green/K01999%09green/K05658%09green/nau%09green/K09808%09green/pper%09green/K05657%09green/K05656%09green/pavi%09green/cpap%09green/oeu%09green/nto%09green/nta%09green/sind%09green/pmum%09green/K05663%09green/K05643%09green/K05666%09green
map04016	Environmental Information Processing	Signal transduction	MAPK signaling pathway - plant	603	transcript_61;transcript_67;transcript_71;transcript_210;transcript_288;transcript_572;transcript_582;transcript_663;transcript_727;transcript_737;transcript_777;transcript_846;transcript_904;transcript_1058;transcript_1092;transcript_1111;transcript_1200;transcript_1239;transcript_1450;transcript_1532;transcript_1660;transcript_1997;transcript_2058;transcript_2125;transcript_2174;transcript_2203…	map04016	http://www.genome.jp/dbget-bin/show_pathway?map04016/K17686%09green/K20606%09green/cann%09green/K04730%09green/K20603%09green/K20725%09green/K20726%09green/K20600%09green/bvg%09green/K14509%09green/K20605%09green/K20604%09green/K12619%09green/K20537%09green/K03781%09green/K13416%09green/K13412%09green/K13413%09green/K13418%09green/sind%09green/K14510%09green/K13433%09green/K14512%09green/psom%09g…
map04070	Environmental Information Processing	Signal transduction	Phosphatidylinositol signaling system	249	transcript_417;transcript_612;transcript_677;transcript_907;transcript_1100;transcript_1111;transcript_1200;transcript_1450;transcript_1660;transcript_2173;transcript_2174;transcript_2203;transcript_2230;transcript_2253;transcript_2349;transcript_2508;transcript_3752;transcript_3855;transcript_3951;transcript_4678;transcript_5336;transcript_6025;transcript_6192;transcript_7645;transcript_8227;tra…	map04070	http://www.genome.jp/dbget-bin/show_pathway?map04070/K00999%09green/K18649%09green/cann%09green/K01110%09green/K10572%09green/K21289%09green/K00915%09green/K00914%09green/K00913%09green/K20279%09green/K13412%09green/K21797%09green/K13024%09green/psom%09green/K03084%09green/K00889%09green/K00888%09green/pavi%09green/K15909%09green/oeu%09green/K00981%09green/K05857%09green/K00921%09green/nto%09gree…
map04075	Environmental Information Processing	Signal transduction	Plant hormone signal transduction	888	transcript_61;transcript_67;transcript_71;transcript_149;transcript_210;transcript_214;transcript_274;transcript_288;transcript_310;transcript_453;transcript_495;transcript_572;transcript_588;transcript_597;transcript_619;transcript_638;transcript_663;transcript_675;transcript_707;transcript_727;transcript_777;transcript_846;transcript_904;transcript_973;transcript_1010;transcript_1092;transcript…	map04075	http://www.genome.jp/dbget-bin/show_pathway?map04075/K14486%09green/K14487%09green/K14484%09green/K14485%09green/pvu%09green/cann%09green/K14488%09green/K14489%09green/nsy%09green/bvg%09green/K13449%09green/nnu%09green/K13946%09green/K13415%09green/K13416%09green/K14432%09green/K14431%09green/K13413%09green/K13418%09green/nau%09green/K14510%09green/K13433%09green/K14512%09green/K14513%09green/K14…
map04144	Cellular Processes	Transport and catabolism	Endocytosis	656	transcript_85;transcript_204;transcript_262;transcript_394;transcript_449;transcript_455;transcript_456;transcript_593;transcript_811;transcript_907;transcript_1053;transcript_1074;transcript_1159;transcript_1235;transcript_1375;transcript_1487;transcript_1503;transcript_1574;transcript_1584;transcript_1600;transcript_1623;transcript_1835;transcript_1947;transcript_2219;transcript_2473;transcript…	map04144	http://www.genome.jp/dbget-bin/show_pathway?map04144/phu%09green/K10365%09green/K10591%09green/cann%09green/K23612%09green/K12184%09green/pop%09green/K01115%09green/K10396%09green/K12489%09green/K07888%09green/K07889%09green/K12471%09green/K12472%09green/clec%09green/K19366%09green/K19367%09green/K12479%09green/K19476%09green/K12192%09green/K12193%09green/K12190%09green/K12191%09green/K12196%09gr…
map04145	Cellular Processes	Transport and catabolism	Phagosome	533	transcript_55;transcript_414;transcript_567;transcript_788;transcript_902;transcript_917;transcript_1021;transcript_1100;transcript_1222;transcript_1315;transcript_1380;transcript_1421;transcript_1520;transcript_1555;transcript_1631;transcript_1644;transcript_1878;transcript_2019;transcript_2103;transcript_2283;transcript_2585;transcript_2605;transcript_2683;transcript_2693;transcript_2699;transc…	map04145	http://www.genome.jp/dbget-bin/show_pathway?map04145/K02146%09green/K01365%09green/K21289%09green/K00914%09green/K07888%09green/K07889%09green/K04392%09green/K02155%09green/K02154%09green/K02153%09green/K02152%09green/K02151%09green/K02150%09green/K09487%09green/K09481%09green/K10956%09green/K08488%09green/K07374%09green/K07375%09green/cic%09green/K05692%09green/cpap%09green/K03661%09green/oeu%09…
map04146	Cellular Processes	Transport and catabolism	Peroxisome	389	transcript_853;transcript_1664;transcript_1778;transcript_1812;transcript_1929;transcript_1963;transcript_1997;transcript_2191;transcript_2430;transcript_2815;transcript_3327;transcript_3459;transcript_3730;transcript_3794;transcript_4240;transcript_4476;transcript_4833;transcript_5589;transcript_6128;transcript_6615;transcript_7120;transcript_7130;transcript_7318;transcript_7569;transcript_7989;…	map04146	http://www.genome.jp/dbget-bin/show_pathway?map04146/nto%09green/K11517%09green/K00830%09green/K11147%09green/K01640%09green/K03781%09green/K13348%09green/K13347%09green/K17879%09green/K04564%09green/K04565%09green/K01578%09green/K13237%09green/K01897%09green/K13341%09green/K13342%09green/K13343%09green/K13344%09green/K13345%09green/K13346%09green/K00031%09green/K05677%09green/K12663%09green/K122…
map04136	Cellular Processes	Transport and catabolism	Autophagy - other	159	transcript_111;transcript_1902;transcript_2032;transcript_2725;transcript_3567;transcript_3571;transcript_3664;transcript_4107;transcript_4627;transcript_5126;transcript_6115;transcript_6507;transcript_7398;transcript_8049;transcript_8405;transcript_8648;transcript_8701;transcript_9371;transcript_12551;transcript_13186;transcript_17570;transcript_17978;transcript_18437;transcript_18728;transcript…	map04136	http://www.genome.jp/dbget-bin/show_pathway?map04136/cann%09green/K17906%09green/K17890%09green/K00914%09green/K08269%09green/K19730%09green/K08266%09green/K21289%09green/K08341%09green/K08342%09green/K08343%09green/K17908%09green/K04382%09green/K07203%09green/K07204%09green/K17907%09green/K08339%09green/K08331%09green/K08330%09green/K08333%09green/K17606%09green/K08334%09green/K08337%09green/K08…
map04712	Organismal Systems	Environmental adaptation	Circadian rhythm - plant	183	transcript_212;transcript_234;transcript_667;transcript_2195;transcript_2538;transcript_3507;transcript_3844;transcript_4664;transcript_5843;transcript_5883;transcript_6977;transcript_8775;transcript_9935;transcript_12402;transcript_12909;transcript_18547;transcript_18561;transcript_18785;transcript_68616;transcript_69157;transcript_69770;transcript_72425;transcript_72546;transcript_73359;transcr…	map04712	http://www.genome.jp/dbget-bin/show_pathway?map04712/nto%09green/cann%09green/pavi%09green/nsy%09green/K00660%09green/cmos%09green/K12130%09green/nau%09green/K12133%09green/pper%09green/K16240%09green/cpep%09green/K10143%09green/K16221%09green/K12118%09green/K12119%09green/K03097%09green/K16241%09green/K12116%09green/oeu%09green/K12115%09green/ccaj%09green/K03115%09green/qsu%09green/nta%09green/s…
map04626	Organismal Systems	Environmental adaptation	Plant-pathogen interaction	716	transcript_167;transcript_210;transcript_247;transcript_270;transcript_288;transcript_289;transcript_322;transcript_344;transcript_381;transcript_524;transcript_626;transcript_644;transcript_656;transcript_660;transcript_697;transcript_725;transcript_1058;transcript_1093;transcript_1111;transcript_1143;transcript_1200;transcript_1347;transcript_1450;transcript_1660;transcript_1731;transcript_1782…	map04626	http://www.genome.jp/dbget-bin/show_pathway?map04626/K20605%09green/K04730%09green/K18835%09green/K18834%09green/K12795%09green/K02358%09green/K20600%09green/K15397%09green/K13414%09green/K13416%09green/K09487%09green/K13412%09green/K13413%09green/K13418%09green/K13456%09green/K13457%09green/K13432%09green/K05391%09green/K14512%09green/psom%09green/K13436%09green/K04733%09green/K13434%09green/K02…
map04933	Human Diseases	Endocrine and metabolic disease	AGE-RAGE signaling pathway in diabetic complications	111	transcript_2103;transcript_2173;transcript_2230;transcript_2693;transcript_5093;transcript_6192;transcript_6971;transcript_7327;transcript_8835;transcript_13006;transcript_68725;transcript_69037;transcript_69174;transcript_69578;transcript_69681;transcript_69877;transcript_70467;transcript_71013;transcript_74516;transcript_75365;transcript_75976;transcript_76098;transcript_77544;transcript_78892;…	map04933	http://www.genome.jp/dbget-bin/show_pathway?map04933/K13303%09green/K05857%09green/K04456%09green/K04392%09green/K02159%09green/K04371%09green
map01502	Human Diseases	Drug resistance: antimicrobial	Vancomycin resistance	3	transcript_83892;transcript_61631;transcript_36282	map01502	http://www.genome.jp/dbget-bin/show_pathway?map01502/K01000%09green/K02563%09green

## Sheet: Supplementary Table 5
Supplementary Table 5. Sequencing data statistics.
Sample	Raw reads	Raw bases	Clean reads	Clean bases	Error rate(%)	Q20(%)	Q30(%)	GC content(%)
SAAPI_leaf1	46755056	7060013456	46218706	6791816074	0.0243	98.27	94.86	49.01
SAAPI_leaf2	48498062	7323207362	47995282	7052395708	0.0241	98.34	95.03	49
SAAPI_leaf3	47191744	7125953344	46695850	6863531031	0.0241	98.34	95.05	49.07
SAAPI_root1	51096844	7715623444	50734930	7476814004	0.0243	98.27	94.82	46.93
SAAPI_root2	50934458	7691103158	50484354	7465397083	0.0246	98.18	94.58	46.85
SAAPI_root3	50185068	7577945268	49727078	7316987385	0.0246	98.18	94.58	46.94

## Sheet: Supplementary Table 6
Supplementary Table 6. Candidate genes in S. apiana secondary metabolites pathway.
Pathway	First Category	Second Category	Pathway_definition	num_of_seqs
map00900	Metabolism	Metabolism of terpenoids and polyketides	Terpenoid backbone biosynthesis	238
map00902	Metabolism	Metabolism of terpenoids and polyketides	Monoterpenoid biosynthesis	39
map00909	Metabolism	Metabolism of terpenoids and polyketides	Sesquiterpenoid and triterpenoid biosynthesis	37
map00904	Metabolism	Metabolism of terpenoids and polyketides	Diterpenoid biosynthesis	32
map00906	Metabolism	Metabolism of terpenoids and polyketides	Carotenoid biosynthesis	98
map00905	Metabolism	Metabolism of terpenoids and polyketides	Brassinosteroid biosynthesis	67
map00908	Metabolism	Metabolism of terpenoids and polyketides	Zeatin biosynthesis	35
map00903	Metabolism	Metabolism of terpenoids and polyketides	Limonene and pinene degradation	28
map00523	Metabolism	Metabolism of terpenoids and polyketides	Polyketide sugar unit biosynthesis	9
map00940	Metabolism	Biosynthesis of other secondary metabolites	Phenylpropanoid biosynthesis	386
map00945	Metabolism	Biosynthesis of other secondary metabolites	Stilbenoid, diarylheptanoid and gingerol biosynthesis	111
map00941	Metabolism	Biosynthesis of other secondary metabolites	Flavonoid biosynthesis	132
map00944	Metabolism	Biosynthesis of other secondary metabolites	Flavone and flavonol biosynthesis	7
map00942	Metabolism	Biosynthesis of other secondary metabolites	Anthocyanin biosynthesis	6
map00943	Metabolism	Biosynthesis of other secondary metabolites	Isoflavonoid biosynthesis	18
map00901	Metabolism	Biosynthesis of other secondary metabolites	Indole alkaloid biosynthesis	7
map00950	Metabolism	Biosynthesis of other secondary metabolites	Isoquinoline alkaloid biosynthesis	80
map00960	Metabolism	Biosynthesis of other secondary metabolites	Tropane, piperidine and pyridine alkaloid biosynthesis	74
map00232	Metabolism	Biosynthesis of other secondary metabolites	Caffeine metabolism	9
map00965	Metabolism	Biosynthesis of other secondary metabolites	Betalain biosynthesis	14
map00966	Metabolism	Biosynthesis of other secondary metabolites	Glucosinolate biosynthesis	16
map00261	Metabolism	Biosynthesis of other secondary metabolites	Monobactam biosynthesis	49
map00254	Metabolism	Biosynthesis of other secondary metabolites	Aflatoxin biosynthesis	3
map00998	Metabolism	Biosynthesis of other secondary metabolites	Biosynthesis of various secondary metabolites - part 2	2
